1 Article type: Regular Manuscript

2

3 **Seasonal and long-term consequences of esca on grapevine stem xylem**  
4 **integrity**

5

6 G. Bortolami<sup>a</sup>, E. Farolfi<sup>a</sup>, E. Badel<sup>b</sup>, R. Burlett<sup>c</sup>, H. Cochard<sup>b</sup>, N. Ferrer<sup>a</sup>, A. King<sup>d</sup>, L.J.  
7 Lamarque<sup>c,e</sup>, P. Lecomte<sup>a</sup>, M. Marchesseau-Marchal<sup>a</sup>, J. Pouzoulet<sup>f</sup>, J.M. Torres-Ruiz<sup>b</sup>, S.  
8 Trueba<sup>c,g</sup>, S. Delzon<sup>c</sup>, G.A. Gambetta<sup>f</sup>, C.E.L. Delmas<sup>a\*</sup>

9

10 <sup>a</sup>INRAE, BSA, ISVV, SAVE, 33882 Villenave d'Ornon, France

11 <sup>b</sup>Université Clermont-Auvergne, INRAE, PIAF, 63000 Clermont-Ferrand, France

12 <sup>c</sup>Univ. Bordeaux, INRAE, BIOGECO, 33615 Pessac, France

13 <sup>d</sup>Synchrotron SOLEIL, L'Orme des Merisiers, Gif-sur-Yvette, 91192, France

14 <sup>e</sup>Département des Sciences de l'Environnement, Université du Québec à Trois-Rivières, Trois-  
15 Rivières, Québec, G9A 5H7, Canada

16 <sup>f</sup>EGFV, Bordeaux-Sciences Agro, INRAE, Université de Bordeaux, ISVV, 210 chemin de  
17 Leysotte, 33882 Villenave d'Ornon, France

18 <sup>g</sup>School of Forestry and Environmental Studies, Yale University, New Haven, CT 06511, USA

19

20

21 \*Author for correspondence

22 Chloé E. L. DELMAS

23 Tel: +33557122636

24 Email: [chloe.delmas@inrae.fr](mailto:chloe.delmas@inrae.fr)

25 ORCID ID: [0000-0003-3568-605X](https://orcid.org/0000-0003-3568-605X)

## 26 SUMMARY

- 27 · Hydraulic failure has been extensively studied during drought-induced plant dieback, but  
28 its role in plant-pathogen interactions is under debate. During esca, a grapevine (*Vitis*  
29 *vinifera*) disease, symptomatic leaves are prone to irreversible hydraulic dysfunctions but  
30 little is known about the hydraulic integrity of perennial organs over the short- and long-  
31 term.
- 32 · We investigated the effects of esca on stem hydraulic integrity in naturally infected plants  
33 within a single season and across season(s). We coupled *in vivo* X-ray microtomography  
34 visualizations with direct ( $k_s$ ) and indirect ( $k_{th}$ ) hydraulic conductivity measurements, and  
35 tylose and vascular pathogen detection.
- 36 · Although no loss of hydraulic conductivity (PLC) was observed in asymptomatic and 40%  
37 of symptomatic stems, 60% of symptomatic stems presented xylem occlusions with  
38 subsequent PLC, which could reach critical levels (over 50% PLC). A loss of stem  $k_s$  was  
39 observed simultaneously, or after, the occurrence of leaf symptoms in the presence of  
40 tyloses. The impact of esca on xylem integrity was only seasonal and no long-term impact  
41 of disease history was recorded.
- 42 · Our study demonstrated how and to what extent a vascular disease such as esca, affecting  
43 xylem integrity, could amplify plant mortality by hydraulic failure.

44

45 **Key words:** Esca, hydraulic failure, plant dieback, vascular pathogens, *Vitis vinifera* L.,  
46 tyloses, X-ray microCT, xylem anatomy

## 47 INTRODUCTION

48 In agricultural and forest ecosystems, perennial plant dieback causes decreases in plant  
49 productivity and longevity (Aleemullah & Walsh, 1996; Eskalen *et al.*, 2013; Urbez-Torres *et*  
50 *al.*, 2013; Alwindia & Gallema, 2017). Plant dieback is a complex process where different biotic  
51 and/or abiotic stress factors interact and contribute to leaf and crown wilting and ultimately  
52 plant death (Desprez-Lostau *et al.*, 2006; Anderegg *et al.*, 2013, Cailleret *et al.*, 2017;  
53 Bettenfeld *et al.*, 2020). Drought-mediated plant dieback has been extensively studied, and in  
54 this case hydraulic failure has been identified as the primary cause of plant death (Anderegg *et*  
55 *al.*, 2016). Hydraulic failure results from an interruption of the ascendant water flow by air  
56 embolism or xylem occlusion (Zimmermann, 1983; Tyree & Sperry, 1989). Vascular  
57 pathogens, which infect the xylem network (Yadeta & Thomma, 2013), are also important  
58 drivers of pathogen-mediated plant dieback (Goberville *et al.*, 2016; Pandey *et al.*, 2018; Fallon  
59 *et al.*, 2020).

60 Vascular pathogens induce wood necrosis, leaf symptoms, and crown defoliation (Beckmann  
61 & Roberts, 1995; Pearce, 1996). Their biology and toxic metabolite production has been well  
62 studied, in particular using controlled phytotoxicity assays (Andolfi *et al.*, 2011; Akpaninyang  
63 & Opara, 2017). However, the possible role of hydraulic failure during pathogen-mediated  
64 plant dieback has been poorly investigated, and the underlying physiological mechanisms  
65 inducing leaf symptoms are not clear yet (Fradin & Thomma, 2006; McDowell *et al.*, 2008).  
66 Moreover, the long-term impact (over seasons) and relationships between pathogens, leaf  
67 symptom presence, and the hydraulic functioning of the plant are still unknown. During  
68 vascular pathogenesis, both air (Pérez-Donoso *et al.*, 2016) and non-gaseous (Sun *et al.*, 2013;  
69 Pouzoulet *et al.*, 2019) embolism have been observed. For example, air embolism is thought to  
70 accelerate pathogen progression during Pierce's disease (Pérez-Donoso *et al.*, 2016), and non-  
71 gaseous embolism is associated with occlusion of the xylem conduits by the plant that could  
72 slow the disease process while interfering with xylem water transport (Sun *et al.*, 2013;  
73 Pouzoulet *et al.*, 2019).

74 Xylem occlusion, usually through the production of tyloses and gels, is one of the first plant  
75 defense mechanisms against vascular pathogens (Pearce, 1996). Xylem parenchyma cells  
76 secrete gels and expand into the vessel lumen, forming tyloses, physically blocking pathogen  
77 progression (Zimmermann, 1979). Xylem anatomy plays an important role, both for vascular  
78 pathogen development (Martin *et al.*, 2009; Martín *et al.*, 2013; Venturas *et al.*, 2014;

79 Pouzoulet *et al.*, 2017; 2020) and for tylose formation (Bonsen & Kucera, 1990; De Micco *et*  
80 *al.*, 2016; Pouzoulet *et al.*, 2019). If effective, this occlusion mechanism allows the plant to  
81 compartmentalize the infected zone and to generate new tissue around it (CODIT model,  
82 Pearce, 1996). Because tyloses can potentially interfere with the hydraulic functioning of the  
83 plant, they could exacerbate disease symptoms (Talboys, 1972). Tyloses are usually observed  
84 in close proximity to pathogens, as shown in artificial inoculation studies (Clerivet *et al.*, 2000;  
85 Rioux *et al.*, 2018, among others). However, pathogens frequently proliferate in perennial  
86 organs without physically reaching the leaves, thus leaf symptoms are often induced at a  
87 distance (Beckmann & Roberts, 1995). A recent study shows that tyloses can be present in  
88 symptomatic leaves at a distance from the pathogen niches resulting in decreased leaf hydraulic  
89 conductivity (Bortolami *et al.*, 2019).

90 Over the last decades, grapevine (*Vitis vinifera* L.) mortality and yield loss have been reported  
91 in European, American, and South African vineyards due to esca trunk disease (Cloete *et al.*,  
92 2015; Guerin-Dubrana *et al.*, 2019). Esca affects mostly mature grapevines (more than seven-  
93 years-old), and symptoms include trunk necrosis and leaf symptoms, consisting of “tiger-  
94 stripe” necrosis and leaf wilting (Lecomte *et al.*, 2012; Claverie *et al.*, 2020), which are not  
95 regularly expressed season-to-season even within individual vines (Guerin-Dubrana *et al.*,  
96 2013; Li *et al.*, 2017). While the pathogens responsible for esca-induced trunk necrosis have  
97 been identified (Morales-Cruz *et al.*, 2018; Brown *et al.*, 2020), the underlying mechanisms of  
98 leaf and fruit symptoms, and plant death are still poorly understood. Bortolami *et al.* (2019)  
99 demonstrated that the two vascular pathogens related to esca (*Phaeoconiella chlamydospora*  
100 and *Phaeoacremonium minimum*) were never detected in leaves or in one-year old stems, but  
101 always in the trunk (independently from leaf symptom presence). They further showed that  
102 esca symptomatic leaves presented significant losses in hydraulic conductivity due to the  
103 occlusion of the xylem conduits by tyloses. Together, these results suggest a relevant role of  
104 hydraulic failure in esca leaf symptom formation, but whether or not there is a corresponding  
105 failure in perennial organs, and the exact timing of these phenomena, are still unknown. As  
106 stems and branches are the direct connections between the pathogen niche in the trunk and the  
107 observed symptoms in the leaves, the study of stem xylem integrity is crucial in the  
108 understanding of leaf symptom formation in the current year and across seasons.

109 In this study, we investigated stem xylem integrity in grapevine during esca leaf symptom  
110 formation asking the following questions: (i) Can esca lead to hydraulic failure in perennial

111 organs? (ii) Does stem hydraulic failure occur prior to or after leaf symptom expression, and  
112 does it depend on xylem anatomy? (iii) Do long-term symptomatic plants present different  
113 xylem anatomy and levels of hydraulic failure from long-term asymptomatic plants? To answer  
114 these questions, we transplanted 28-years-old grapevines (*Vitis vinifera* L. cv Sauvignon blanc)  
115 from the field into pots to transport, manipulate, and study naturally esca-infected vines. We  
116 coupled *in vivo* visualizations of stem xylem functionality (using synchrotron-based X-ray  
117 microcomputed tomography) with stem specific hydraulic conductivity measurements ( $k_s$ ),  
118 theoretical hydraulic conductivity estimates ( $k_{th}$ ), optical observations of vessel occlusions, and  
119 pathogen detection during symptom appearance, while comparing plants with different  
120 symptom history record.

121

## 122 **MATERIALS AND METHODS**

### 123 **Plant material**

124 *Vitis vinifera* cv. Sauvignon blanc grafted onto 101-14 MGt were uprooted in winter 2017,  
125 2018, and 2019 from a vineyard planted in 1992 located at INRAE Bordeaux-Nouvelle  
126 Aquitaine (44°47'24.8"N, 0°34'35.1"W) and transferred into pots. Each of these plants has been  
127 surveyed each year in the field since 2012 for esca leaf symptom expression following Lecomte  
128 *et al.* (2012), and has been classified yearly as leaf-symptomatic or asymptomatic. Plants were  
129 then classified by their long-term symptomatology record: plants asymptomatic from 2012 to  
130 2018 (pA, previously asymptomatic), and plants that have expressed symptoms at least once  
131 between 2012 and 2018 (pS, previously symptomatic). The uprooting method and greenhouse  
132 growth conditions are detailed in Bortolami *et al.* (2019).

### 133 **Esca symptom notation**

134 The evolution of esca leaf symptoms was surveyed twice a week from June to October 2019  
135 on every plant (n=84, Fig. 1). As presented in Fig. 1a, esca symptoms were scored at the stem  
136 and whole plant scales. Single stems collected for analyses (both hydraulic measurements or  
137 microCT observations) could be noted as: asymptomatic (green leaves and apparently healthy),  
138 pre-symptomatic (leaves presenting yellowing or small yellow spots between the veins), tiger-  
139 stripe (typical pattern of esca leaf symptoms), or apoplectic (leaves passing from green to  
140 wilted in a couple of days). Along the experimentation, entire plants could be noted as

141 asymptomatic (control) or symptomatic (when at least 25% of the canopy was presenting tiger-  
142 stripe leaf symptoms). At the end of the experiment (week 40, October 2019) each plant was  
143 classified as symptomatic or asymptomatic (control). We were then able to group each stem  
144 measured into six different groups (Fig. 1a): one group of stems from control plants  
145 (asymptomatic from June to October) and five groups of stems from symptomatic plants: two  
146 before symptom appearance (asymptomatic and pre-symptomatic stems); and three after  
147 symptom appearance (asymptomatic, tiger-stripe, and apoplectic stems). To clearly  
148 differentiate asymptomatic stems collected from symptomatic plants and asymptomatic stems  
149 collected from asymptomatic plants, we considered plants (and their stems) that didn't show  
150 leaf symptoms during the experiment as control plants (or stems). We investigated whether  
151 symptom expression (final symptom notation in October 2019, see Fig. 1) differed between  
152 plants with contrasted long-term symptom history (previously asymptomatic vs previously  
153 symptomatic, Table 1) using a Chi-square test of independence.

154

#### 155 **X-ray microCT observation**

156 Synchrotron-based microCT was used to visualize the content of vessels and their functionality  
157 in esca tiger-stripe and control stems. Three symptomatic plants (presenting tiger-stripe  
158 symptoms for 8, 7, and 3 weeks), and one asymptomatic-control plant were brought to the  
159 PSICHE beamline (King *et al.*, 2016) at SOLEIL synchrotron facility in September 2019.  
160 Shoots (ca. 2 m long) were cut under water and transferred into a solution containing 75mM of  
161 contrasting agent iohexol. The iohexol solution absorbs X-rays very strongly and appears bright  
162 white in X-ray scans above the iodine K-edge at 33.2 keV, and, once it has been taken up by  
163 the transpiration stream, the effective functionality of each vessel can be confirmed (Pratt &  
164 Jacobsen, 2018; Bortolami *et al.*, 2019). These stems were moved and left outdoor to transpire  
165 the solution for at least half a day. The stems were then transferred to the beamline stage and  
166 scanned twice in less than 5 minutes using two different energies of a high-flux ( $3 \times 10^{11}$   
167 photons  $\text{mm}^{-2}$ ) monochromatic X-ray beam: 33.1 keV and 33.3 keV. The projections were  
168 recorded with a sCMOS camera equipped with a 250-mm-thick LuAG scintillator (Orca Flash,  
169 Hamamatsu, Japan). The complete tomographic scan included 1500 projections, and each  
170 projection lasted 50 ms. Tomographic reconstructions were performed using PyHST2 software  
171 (Mirone *et al.*, 2014) using the Paganin method (Paganin *et al.*, 2002), resulting in 32-bit

172 volume reconstructions of 2048 x 2048 x 1024 voxels. The final spatial resolution was 2.8769  
173  $\mu\text{m}^3$  voxel<sup>-1</sup>.

#### 174 **Image analysis of microCT scans**

175 The contrast agent iohexol allowed us to distinguish in intact scans the effective functionality  
176 of each vessel. In the absence of iohexol, X-ray microCT scans are used to distinguish air-filled  
177 vessels (appearing black, corresponding to native PLC) from sap-filled vessels (appearing  
178 grey). The addition of iohexol in the xylem sap allows to distinguish the functional vessels  
179 (they appear bright white when they transport the sap), from the non-functional ones (i.e.  
180 occluded vessels remaining grey, corresponding to occlusion PLC). We could also observe  
181 partially occluded vessels (i.e. vessels with simultaneous presence of air and occlusions, or sap  
182 and occlusions). This specific case was observed by checking the presence of any occlusion in  
183 at least 200 slices in each volume. Partially occluded vessels were considered as occluded,  
184 some examples are presented in Fig. S1. The equivalent-circle diameter of air-filled, occluded,  
185 and functional (iohexol-filled) vessels was measured on the cross sections from the central slice  
186 of the microCT scanned volume using ImageJ software (Schneider et al., 2012). Native PLC,  
187 occlusion PLC, and total PLC (i.e. summing occlusion with native PLC) were calculated with  
188 the Hagen-Poiseuille equation, as in Bortolami *et al.* 2019, (see Method S1). We investigated  
189 whether native PLC, and occlusion PLC differed between control and esca tiger-stripe plants,  
190 using two independent generalized mixed linear models where plants were treated as a random  
191 effect. Proportional data (ranging from 0 to 1, dividing all PLC values by 100) was analyzed  
192 to fit a logit link function and binomial distribution as appropriate.

193

#### 194 **Monitoring stem hydraulic properties over time**

195 Stem xylem integrity was monitored over time by measuring hydraulic properties in control  
196 and symptomatic plants along the season and during esca development. Stem specific hydraulic  
197 conductivity ( $k_s$ ) was measured by the gravity method (Sperry et al., 1988), and compared to  
198 its theoretical analog ( $k_{th}$ ) calculated from xylem anatomical observations on the same stem  
199 (see below). When there are observed differences in  $k_s$  among stems, comparisons with  
200 theoretical maximums ( $k_{th}$ ) can show if lower  $k_s$  values result from anatomical differences (i.e.  
201 different vessel size distributions) or by hydraulic failure (in the case of similar vessel size and  
202 density). If  $k_s$  varies in unity with  $k_{th}$ , differences in  $k_s$  might result from anatomical differences

203 (e.g. smaller  $k_s$  are related to smaller vessels), otherwise  $k_s$  variations are the consequence of  
204 hydraulic failure. Each method to measure  $k_s$ ,  $k_{th}$ , and to observe tyloses is described below.

205 Sampling started on June 19<sup>th</sup> and finished on September 13<sup>th</sup> 2019 for a total of 10 sampling  
206 dates, 39 stems from 23 control-asymptomatic plants, and 49 stems from 17 symptomatic  
207 plants. We randomly sampled control plants and esca symptomatic plants all along the season  
208 through the evolution of esca symptoms, obtaining measurements from 14 weeks before until  
209 10 weeks after symptom appearance. To explore the contribution of the experimental design to  
210 data analysis, we tested the effect of the year of uprooting (2018 and 2019), the position of the  
211 analyzed internode, and the week of the measurement (i.e. evolution during the season) on  $k_s$   
212 and  $k_{th}$  in control plants using separate generalized linear mixed model with normal  
213 distributions and the plant treated as a random variable (Table S1). A significant impact of the  
214 year of uproot was found for  $k_s$  and  $k_{th}$  values in control plants (Table S1). This could have  
215 resulted from the more favorable conditions (i.e. climatic stability and nutrient availability) for  
216 the greenhouse grown vines (note that plants uprooted in 2017 were only esca symptomatic  
217 and were not included in this analysis). However, once  $k_s$  and  $k_{th}$  are plotted together (Fig. S2),  
218 all the values lie on the same regression line without generating outlier values (smaller  $k_s$  values  
219 correspond to smaller  $k_{th}$  values independently of the uprooting year).

### 220 *Stem specific hydraulic conductivity ( $k_s$ )*

221  $k_s$  measurements were performed on one internode of >1.5m long one-year old stems, following  
222 Torres-Ruiz *et al.* (2012) gravity method (see Method S2 for details). A flow of 20 mM KCl  
223 solution passed through the sample from a reservoir to a precision electronic balance  
224 (AS220.R2, RADWAG, Radom, PL) recording the weight every 5 seconds using the  
225 WinWedge v3 5.0 software (TAL Technologies, Philadelphia, PA, USA). Hydraulic  
226 conductance,  $k$  [ $\text{kg s}^{-1} \text{MPa}^{-1}$ ] was obtained by the slope generated by the flow and the  
227 corresponding pressure. The linear relationship between flow and pressure obtained were  
228 always characterized by  $R^2 > 0.97$ . Stem specific hydraulic conductivity,  $k_s$  [ $\text{kg s}^{-1} \text{MPa}^{-1} \text{m}^{-1}$ ],  
229 was calculated as follows:

$$230 \quad k_s = (k \times l) / A$$

$$231 \quad A = ((d_1/2)^2 \times \pi) - ((d_2/2)^2 \times \pi)$$



232 Where:  $k$  is the hydraulic conductance,  $l$  is the length of the sample,  $A$  is the xylem area,  $d_1$  is  
233 the external diameter of the debarked stem, and  $d_2$  is the diameter of the central pith.

### 234 ***Stem theoretical hydraulic conductivity ( $k_{th}$ ), vessel anatomy, and tylose observation***

235 Just before hydraulic conductivity measurements, the lower internode was stored at 4 °C in  
236 80% ethanol for analysis of xylem anatomy. When possible, the same internode of  $k_s$   
237 measurements was used for anatomical analysis and  $k_{th}$  estimations, otherwise the stored  
238 internode was used for the following protocol. 50 µm thick slices were obtained using a GSL-  
239 1 microtome (Gärtner *et al.*, 2014). Slices were stained using a 0.5% safranin solution during  
240 5 minutes, and then washed three to four times in ethanol (100%). They were quickly soaked  
241 in xylene and mounted on microscope slides with Permount Mounting Medium (Electron  
242 Microscopy Science, Hatfield, PA, USA). Images were captured with a stereo microscope  
243 SMZ1270 (Nikon, France) mounted with a DS-Fi3 camera (Nikon, France). The theoretical  
244 conductivity of each vessel ( $k_{vessel}$ ) [ $\text{kg m Mpa}^{-1} \text{s}^{-1}$ ] was calculated using the Hagen-Poiseuille  
245 equation:

$$246 \quad k_{vessel} = (\pi \times \varnothing^4 \times \rho) / (128 \times \eta)$$

247 Where  $\varnothing$  is the equivalent circle diameter [m] (measured with ImageJ software),  $\rho$  the density  
248 of water [ $998.2 \text{ kg m}^{-3}$  at 20 °C], and  $\eta$  the viscosity of water [ $1.002 \times 10^{-9} \text{ MPa s}$  at 20 °C].  $k_{th}$   
249 of the stem [ $\text{kg s}^{-1} \text{ m}^{-1} \text{ Mpa}^{-1}$ ] was then calculated by summing every  $k_{vessel}$  in the xylem area  
250 ( $A$ ) [ $\text{m}^2$ ]:

$$251 \quad k_{th} = \sum k_{vessel} / A$$

252 In the entire cross section of each sample, the physical presence (or absence) of tyloses in vessel  
253 lumina was visually assessed.

254 Regarding the statistical analysis, stems were grouped in six different categories following their  
255 esca symptomatology (as presented in Fig. 1a). We investigated whether  $k_s$ ,  $k_{th}$ , and total vessel  
256 density differed among these different categories, and how  $k_s$ ,  $k_{th}$ , and total vessel density  
257 differed between stems with and without tyloses (independently from leaf symptom presence),  
258 using independent mixed linear general models. The symptom / tylose category and the year  
259 of uprooting (since it had a significant impact on  $k_s$  and  $k_{th}$  in control plants, Table S1) were  
260 entered as fixed effects, with the plant treated as a random effect since different stems were

261 sometimes analyzed from the same plant (88 analyzed stems on 40 different plants). Total  
262 density and densities for each vessel diameter class were log-transformed prior to analysis to  
263 fit normality requirements. For the classes with no vessels (e.g. samples without vessel  
264 diameters above 160  $\mu\text{m}$ ), a minimal density of 0.0001 was assigned prior to log  
265 transformation. We investigated whether the frequency of symptomatic stems presenting  
266 tyloses changed with the symptom age (i.e. weeks between first symptom detection and  $k_s$   
267 measurements on the same plant) with a Chi-square test. The relationships between stem  $k_s$  and  
268  $k_{th}$  were tested using linear regression models. Finally, we investigated whether  $k_s$  and  $k_{th}$  in  
269 control stems differed between plants with different symptom history records using  
270 independent mixed linear general models with the plant treated as a random effect.

271

## 272 **Fungal detection**

273 Detection and quantification of *Phaeoconiella chlamydospora* and *Phaeoacremonium*  
274 *minimum* were performed using qPCR in a subsample of stems and trunks from the same  
275 symptomatic and control plants used for hydraulic and anatomical measurements. All along the  
276 season, basal internodes, from the same stems sampled for  $k_s$  and  $k_{th}$  measurements, were  
277 directly placed in liquid nitrogen and stored at  $-80\text{ }^\circ\text{C}$ . At the end of the experiment, a subset  
278 of plants was cut at the base for trunk sampling. A 2 cm high section was cut with a sterilized  
279 hand saw. The bark was removed and the different tissues of each section (necrotic and  
280 apparently healthy wood) were separately collected using ethyl alcohol-sterilized shears in a  
281 sterile environment, and immediately placed in liquid nitrogen. All samples were ground in  
282 liquid nitrogen using a tissue lyser (Tissuelyser II, Qiagen, Germantown, MD, USA). DNA  
283 extraction and qPCR analysis were conducted as described in Pouzoulet *et al.* (2013) using the  
284 primer sets PchQF/R and PalQF/R. Detection and quantification of *P. chlamydospora* and *P.*  
285 *minimum* DNA by qPCR (SYBR Green assays) was conducted as described by Pouzoulet *et*  
286 *al.* (2017). After qPCR analysis, the results from each trunk sample (i.e. necrotic or apparently  
287 healthy wood) were averaged together in order to obtain one quantification per plant. Pathogen  
288 DNA quantity (average value of three technical replicates,  $\text{fg}/\mu\text{l}$ ) was normalized by the amount  
289 of total DNA ( $\text{ng}/\mu\text{l}$ ), detected using a Qubit fluorometer. We investigated whether the amount  
290 of fungal DNA (both for *P. chlamydospora* and for *P. minimum*) in trunks differed between  
291 symptomatic and control plants, and between control plants with different symptom history

292 records, using generalized linear mixed model with a poisson distribution and a log likelihood  
293 function.

294

## 295 **Statistical analysis**

296 All data management and statistical tests were done in SAS software (SAS 9.4; SAS Institute).  
297 We used PROC GLIMMIX for generalized linear mixed models, PROC GLM for generalized  
298 linear models, PROC REG for regression analyses and PROC FREQ for frequency analyses  
299 (Chi-square test of independence). The normality of the response variables was tested using a  
300 Kolmogorov-Smirnov test (PROC UNIVARIATE) prior to analyses. Data were log-  
301 transformed (total density) or appropriate distributions (binomial, poisson) were fitted when  
302 appropriate.

303

## 304 **RESULTS**

### 305 **Esca leaf symptom expression within and across seasons**

306 Esca leaf symptoms were recorded in 20 out of the 58 plants followed in this study (35%, Fig.  
307 1, Table 1). The number of symptomatic plants increased gradually with time, from the first  
308 symptom appearance in early June to the last in late September (Fig. 1). There was no effect of  
309 the plant history (previously asymptomatic pA, or previously symptomatic pS) on 2019  
310 symptom expression ( $n=58$ ,  $X^2=0.27$ ,  $P=0.60$ ). On 20 pA plants, six (30%) expressed leaf  
311 symptoms in 2019 (Table 1). On 38 pS plants, fourteen (37%) showed symptoms in 2019  
312 (Table 1). However, pS plants expressed symptoms from June to the end of September, while  
313 pA plants showed leaf symptoms only in September.

314

### 315 ***In vivo* observations of esca symptomatic stems**

316 Xylem vessels of control and tiger-stripe stems were observed using three dimensional X-ray  
317 microCT scans in iohexol-fed samples (Fig. 2, 3, Table S2). As shown in Fig. 2, functional and  
318 non-functional vessels can be discriminated through the use of iohexol (functional vessels  
319 appear bright white, non functional vessels appear either black if air-filled or grey if occluded).

320 We observed almost totally functional stems in all asymptomatic stems (<20% total PLC, Fig.  
321 2a-c), and 40% of tiger-stripe stems (e.g. Fig. 2d-g). Higher levels of PLC (>20% total PLC,  
322 Fig h-m) were observed in the remaining tiger-stripe stems, with 40% of tiger-stripe stems  
323 exhibiting over 50% total PLC (Fig. 2j-m). When the two components of PLC were  
324 disentangled, we observed that the level of native PLC remained low both in control ( $6.5 \pm$   
325  $2.6\%$ ) and in tiger-stripe ( $12.2 \pm 2.9\%$ ) stems (Fig. 3a). Occlusion PLC values were virtually  
326 zero in control stems ( $0.7 \pm 0.02\%$ ) while in tiger-stripe stems the mean occlusion PLC values  
327 was  $27.5 \pm 8.2\%$  (Fig. 3b). Nevertheless, the variability of occlusion PLC across tiger-stripe  
328 stems was very high, the values ranging from 0.3% to 72.9% (Fig. 2d-m, and 3b), and occlusion  
329 PLC was not correlated to symptom age ( $n=10$ ,  $F_{2,7}=0.19$ ,  $P=0.83$ ). Consequently, no statistical  
330 differences in native or occlusion PLC were found between control and tiger-stripe stems (Fig.  
331 3). When higher occlusion PLC was measured (Fig. 2h-m), occluded vessels could be  
332 organized either on one side of the stem (Fig 2j-l) or randomly distributed across the section  
333 (Fig 2h, 2i, 2m). In 90% of symptomatic stems, we observed that the most external vessels  
334 were functional. Occlusions were present equally in all vessel diameter classes (Fig. S3).

335

### 336 **Tylose development, stem specific ( $k_s$ ) and theoretical ( $k_{th}$ ) hydraulic conductivity during** 337 **esca leaf symptom formation**

338 Tyloses were identified in the xylem vessels of certain tiger-stripe stems and throughout the  
339 temporal development of esca leaf symptoms, from the appearance of symptoms to 11 weeks  
340 after. All apoplectic stems and 62.5% (15 of 24 analyzed stems) of esca tiger-stripe stems  
341 presented tyloses, while all other stems (control, asymptomatic or pre-symptomatic) did not  
342 contain these occlusions, even until one week before symptom development. In esca tiger-  
343 stripe stems, tyloses were not related to specific plants, or to symptom age (i.e. on the same  
344 plant at the same moment, different symptomatic stems could present tyloses, or not,  $n=24$ ,  
345  $\chi^2=7.47$ ,  $P=0.38$ ).

346 Overall, no significant impact of esca symptoms was observed on  $k_s$  (Fig. 4a), even if tiger-  
347 stripe stems were divided between those with and without tyloses. Control stems presented a  
348 mean ( $\pm$  SE)  $k_s$  of  $24.97 \pm 1.72 \text{ kg s}^{-1} \text{ MPa}^{-1} \text{ m}^{-1}$ ; all the stems without tyloses measured on  
349 symptomatic plants showed the same range of values as control stems (Fig 4a, Table 2):  $26.04$   
350  $\pm 4.71$  for asymptomatic before symptoms appearance,  $30.32 \pm 4.26$  for pre-symptomatic

351 stems,  $19.80 \pm 5.18$  for asymptomatic stems after symptom appearance on the plant, and  $21.29$   
352  $\pm 5.40$  for tiger-stripe stems without tyloses. Stems with tyloses (tiger-stripe and apoplectic  
353 stems) presented the lowest average  $k_s$  values ( $11.27 \pm 2.86$  and  $2.47 \pm 1.45$   $\text{kg s}^{-1} \text{MPa}^{-1} \text{m}^{-1}$   
354 for tiger-stripe and apoplectic, respectively). Regarding  $k_{th}$ , no significant impact of esca  
355 symptoms was found (Fig. 4c, Table 2), all the values were in the same range, with average  
356 values ranging from 70.44 (for tiger-stripe stems with tyloses) to 87.88 (for pre-symptomatic  
357 stems)  $\text{kg s}^{-1} \text{MPa}^{-1} \text{m}^{-1}$ .

358 In order to further investigate the impact of esca on stem hydraulics, we explored the  
359 relationship between individual stem  $k_s$  and  $k_{th}$  in each symptom category (Fig. 4b, S4, Table  
360 2). Significant relationships were found between  $k_s$  and  $k_{th}$  in all groups except in asymptomatic  
361 stems after symptom appearance and symptomatic stems with the physical presence of tyloses  
362 (Fig. S4, Table 2). The slopes of regression curves between  $k_s$  and  $k_{th}$  did not vary among  
363 groups in the absence of tyloses (slope values ranged between 0.3 and 0.4, Table 2) while it  
364 was close to 0 in the presence of tyloses (0.17 for tiger-stripe and 0.04 for apoplectic stems).  
365 When  $k_s$  and  $k_{th}$  are compared in the presence or absence of tyloses, we observed that  $k_s$  was  
366 significantly lower when tyloses were present ( $9.81 \pm 2.51$   $\text{kg s}^{-1} \text{MPa}^{-1} \text{m}^{-1}$  in the presence of  
367 tyloses vs  $25.06 \pm 1.46$   $\text{kg s}^{-1} \text{MPa}^{-1} \text{m}^{-1}$  in the absence of tyloses, Table 2,  $n=88$ ,  $F_{1,49}=7.11$ ,  
368  $P=0.01$ ) while  $k_{th}$  did not significantly differ. Stems without tyloses presented a strong  
369 correlation between  $k_s$  and  $k_{th}$ , while in the presence of tyloses this relationship was not  
370 significant (Table 2, Fig. 4b).

371 Total vessel density did not significantly differ between stem symptomatology (comparing all  
372 the seven categories presented in Table 2), even when vessel density was partitioned by vessel  
373 diameter classes (Fig. 4d).

374 Finally, we tested the impact of disease history (comparing pA and pS plants) on the hydraulic  
375 conductivity and xylem anatomy in control plants. There were no differences between long-  
376 term symptomatic (pS) and long-term asymptomatic (pA) plants in stem  $k_s$ , stem  $k_{th}$ , or total  
377 vessel density (Table 3).

378

### 379 **Fungal detection**

380 The two vascular pathogens associated with esca (*Phaeoconiella chlamydospora* and  
381 *Phaeoacremonium minimum*) were never detected in one-year old stems while they were  
382 systematically detected in the trunk of both control and symptomatic plants (Table 4). In trunks,  
383 a significantly higher quantity of fungal DNA was detected in tiger-stripe symptomatic plants  
384 than in controls (Table 4). We found 2.14- and 1.64-fold more of *P. chlamydospora* and *P.*  
385 *minimum* DNA in symptomatic trunks relative to controls. In control plants, different symptom  
386 history record impacted the quantity of fungal DNA detected by qPCR, for *Phaeoconiella*  
387 *chlamydospora*, and for *Phaeoacremonium minimum*. We found 1.65- and 2.84-fold more *P.*  
388 *chlamydospora* and *P. minimum* DNA in previously symptomatic trunks relative to previously  
389 asymptomatic trunks (Table 3).

390

## 391 **DISCUSSION**

392 Our results regarding the xylem integrity during esca show that the presence of plant-derived  
393 tyloses induced hydraulic failure in 60% of symptomatic stems. Tyloses were produced  
394 simultaneously with, or after, the occurrence of leaf symptoms, and resulted in more than 50%  
395 PLC in 40% of symptomatic stems, unrelated to symptom age. We demonstrated that the  
396 presence of leaf symptoms during previous seasons had no impact on the likelihood of  
397 symptom appearance in the current year, or on stem hydraulic conductivity and xylem anatomy.  
398 Vascular fungi were never detected in the same organs as the tyloses (one-year old stems), and  
399 although they were present in trunks of both tiger-stripe and control plants, tiger-stripe plants  
400 showed higher quantities of fungal DNA. Among control plants that did not express symptoms  
401 in the year of the study, we found higher quantities of fungal DNA in those plants with a long-  
402 term history of symptom formation. As xylem occlusions were not present in the totality of  
403 tiger-stripe stems, they are unlikely to be the direct structural cause of esca leaf symptom.  
404 However, they could increase the risk of plant mortality, as they impair water transport in a  
405 majority of symptomatic stems.

406

### 407 ***In vivo* xylem integrity observations and hydraulic vulnerability segmentation**

408 Using direct X-ray microCT imaging in esca symptomatic stems, we found that hydraulic  
409 conductivity loss was almost entirely associated with the presence of tyloses. Different studies

410 have investigated the link between vascular pathogen development and hydraulic conductivity  
411 in stems (Collins *et al.*, 2009; Lachenbruch & Zhao, 2019; Mensah *et al.*, 2020). During biotic  
412 stresses, air embolisms have been shown to decrease hydraulic conductivity during bacterial  
413 leaf scorch disease (McElrone *et al.*, 2003; 2008), Pierce's disease (Pérez-Donoso *et al.*, 2016),  
414 and Pine wilt disease (Yazaki *et al.*, 2018). In the case of fungal wilt diseases, the hydraulic  
415 conductivity loss was associated with non-gaseous embolism (i.e. tyloses) at the point of  
416 pathogen inoculation (Guerard *et al.*, 2000; Sallé *et al.*, 2008; Beier *et al.*, 2017; Mensah *et al.*,  
417 2020), or with canker presence in naturally infected stems (Lachenbruch & Zhao, 2019).

418 Using iohexol we were able to visually observe the exact spatial organization of functional  
419 vessels. Interestingly, in some symptomatic samples we found functional vessels surrounding  
420 the non-functional xylem (Fig. 2j-l), suggesting that the plant was able to preserve the more  
421 external vessels from occlusions or to form new functional vessels after the loss of  
422 conductivity. Moreover, the sectoriality of the occlusions observed in Fig. 2j-l was reminiscent  
423 of the sectoriality observed in the distributions of trunk necrosis, especially on the brown stripe  
424 necrosis appearing along the vasculature (Lecomte *et al.*, 2012).

425 Comparing these results with our precedent study using the same technique in leaves, we  
426 showed that esca symptomatic leaves presented higher levels of occlusion PLC ( $60.7 \pm 6.80\%$   
427 in midribs, and  $54.02 \pm 8.72\%$  in petioles, data from Bortolami *et al.*, 2019) compared to stems  
428 ( $27.53 \pm 8.24\%$ , occlusion PLC), suggesting hydraulic vulnerability segmentation (although  
429 PLC in leaves and stems were measured in different plants and years). The hydraulic  
430 segmentation theory relies on the fact that annual organs (i.e. leaves) are more vulnerable than  
431 perennial organs (i.e. stems) to drought induced air embolism (Tyree & Ewers, 1991).  
432 Grapevine is well known for exhibiting strong hydraulic vulnerability segmentation (Charrier  
433 *et al.*, 2016; Hochberg *et al.*, 2016; 2017). This is thought to be adaptive, where the higher  
434 vulnerability in leaves and petioles favors embolism formation and leaf shedding prior to  
435 embolism formation in stems, thus protecting the perennial organs. Our observations during  
436 esca pathogenesis demonstrate that, analogous to the hydraulic vulnerability segmentation  
437 theory, leaves appear more vulnerable to the formation of non-gaseous embolism as well,  
438 which could mitigate the risk of hydraulic failure in perennial organs. From another  
439 perspective, the difference may not be a direct effect of the specific organ's vulnerability to  
440 non-gaseous embolism, but a consequence of a difference in the accumulation of putative  
441 toxins and/or elicitors. Indeed, we confirmed here that esca leaf symptoms occur at a distance

442 from the pathogen niche because vascular pathogens were never detected in one-year old stems,  
443 suggesting that the plant may transport a signal (i.e. toxins or elicitors) from the infected trunk  
444 up to the leaves. If the signal accumulates in leaves in a higher amount than it does in the stems,  
445 and stimulates occlusion formation, stems would then be secondarily affected.

446

#### 447 **Hydraulic conductivity, tyloses, and vessel anatomy**

448 Tyloses could have different impacts, both positive and negative, during wilt disease  
449 pathogenesis: (i) tyloses contribute to pathogen resistance as they aim to seal off vessel lumens  
450 and impede pathogens spread throughout the host (CODIT model, Pearce, 1996). This is the  
451 case regarding the susceptibility of different species or varieties to specific pathogens (Jacobi  
452 & MacDonald, 1980; Ouellette *et al.*, 1999; Clerivet *et al.*, 2000; Et-Touil *et al.*, 2005; Venturas  
453 *et al.*, 2014; Park & Juzwik 2014; Rioux *et al.*, 2018), in particular to *Phaeomoniella*  
454 *chlamydospora*, one of the pathogen associated with esca (Pouzoulet *et al.*, 2017; 2020). (ii) In  
455 other studies, it has been shown that tyloses can exacerbate symptoms (Talboys, 1972): they  
456 cause a reduction in stem hydraulic conductivity, sometimes associated with a reduction in  
457 stomatal conductance in leaves and, in the most severe cases, wilting (Parke *et al.*, 2007; Beier  
458 *et al.*, 2017; Lachenbruch & Zhao, 2019, Mensah *et al.*, 2020 during fungi development; Sun  
459 *et al.*, 2013; Deyett *et al.*, 2019 during Pierce's disease). Our results suggest that during esca  
460 (i) the development of tyloses in stems cannot be interpreted as a systematic trait of pathogen  
461 resistance because visual symptoms were observed despite the presence of tyloses and they  
462 were produced at a distance from pathogens. (ii) When present, tyloses might lead to symptom  
463 exacerbation. Esca has also been suggested to lead to a general reduction in xylem water  
464 transport and stomatal conductance (Ouadi *et al.*, 2019), and tyloses could be a major  
465 contributor to these phenomena as during winter senescence (Salleo *et al.*, 2002; Sun *et al.*,  
466 2008). However, when stems have no tyloses, esca leaf symptom formation seems to arise from  
467 within the leaf itself, and does not result from upstream hydraulic failure.

468 Xylem is the battleground between vascular pathogens and the plant's defense response  
469 (Yadeta & Thomma, 2013). Even if xylem vessel anatomy is less investigated, it could have a  
470 crucial role in plant resistance and response to vascular pathogens. For example, during Dutch  
471 elm wilt disease (due to *Ophiostoma spp.*) the most sensitive species and varieties present wider  
472 xylem vessels (Elgersma, 1970; McNabb *et al.*, 1970; Solla & Gil 2002; Pita *et al.*, 2018).



473 Smaller vessels could occlude faster, sustaining a more efficient pathogen restriction (Venturas  
474 *et al.*, 2014). Our results on xylem vessel anatomy suggest that stems with tyloses tend to  
475 present higher densities of small vessels, even if we did not observe any differences in total  $k_{th}$   
476 values. Moreover, microCT scans showed that occlusions appear randomly in every vessel size  
477 class (Fig. S3). In contrast, artificial inoculations showed that xylem vessel diameter had a  
478 strong impact on esca-related vascular pathogen development (Pouzoulet *et al.*, 2017; 2020),  
479 and in the kinetic of vessel occlusion in grapevine stems (Pouzoulet *et al.*, 2019). The  
480 relationships between esca leaf symptoms, xylem anatomy, and tylose presence should be  
481 studied in detail in trunks, where vascular pathogens are present, and among different grapevine  
482 varieties and rootstocks as they are known to show different susceptibility to symptom  
483 expression.

484

#### 485 **Long-term consequences of esca on leaf symptom expression and stem hydraulic integrity**

486 In field surveys, esca leaf symptoms are often randomly distributed spatially throughout  
487 vineyards and are not consistent from season to season in individual vines (Mugnai *et al.*, 1999;  
488 Surico *et al.*, 2000; Marchi *et al.*, 2006; Guerin-Dubrana *et al.*, 2013; Li *et al.*, 2017). However,  
489 esca-related vine death is strongly related to leaf symptoms as death is usually observed  
490 following a year with symptom expression (Guerin-Dubrana *et al.*, 2013). In agreement with  
491 these field studies, we observed similar percentages of symptomatic plants between those that  
492 had already expressed esca symptoms in the past (from one to seven consecutive years, pS  
493 plants), and those that had never expressed symptoms over the past seven years (pA plants).  
494 However, we also found that pS plants expressed symptoms earlier in the season than pA  
495 plants, suggesting that symptoms might require more time to develop in pA plants. We did not  
496 find any significant differences in  $k_s$  and  $k_{th}$  values between plants with contrasted long-term  
497 symptom history. This result suggests that esca leaf symptoms may have xylem anatomical  
498 consequences within the year of expression by the production of tyloses, but not across seasons.  
499 Moreover, we showed that DNA pathogen amount (*Phaeoacremonium minimum* and  
500 *Phaeomoniella chlamydospora*) depends on the symptom expression in the season of sampling,  
501 and on the long-term symptom history. Altogether, these results suggest that a higher amount  
502 of vascular fungi in the trunk represents a higher risk in reproducing leaf symptoms, and  
503 consequently, a higher risk of plant death.

504

## 505 **Hydraulic failure and esca leaf symptom pathogenesis**

506 Our results showed that, even if esca-related stem occlusion was extremely variable, 40% of  
507 the microCT analyzed stems presented a total PLC greater than 50%. Under drought conditions  
508 alone, studies suggest that grapevines are not able to recover in the current season from PLC  
509 greater than 50% in stems (Charrier *et al.*, 2018). Thus, to what extent these levels of esca-  
510 induced hydraulic failure compromise future vine performance, and/or increase the likelihood  
511 of developing esca leaf symptoms in the future remains an open question.

512 We showed that, similarly to visual leaf symptoms, tyloses in stems were generated at a  
513 distance from the pathogen niche in the trunk. Comparing our results with Bortolami *et al.*  
514 (2019), we show that hydraulic failure affected leaves, on average, two times more than stems.  
515 We could hypothesize that, following pathogen activities in the trunk, a signal passing through  
516 the xylem network and stimulating tyloses, first accumulates in leaves and then affects the  
517 stems. However, the exact signal and action remain unknown, as we showed that the presence  
518 of tyloses depended upon given symptomatic stems rather than symptomatic plants (i.e. two  
519 stems in the same plant, with same tiger-stripe symptoms, sampled at the same moment, could  
520 or could not present tyloses).

521 We showed that there were no differences in symptom expression, nor in the stem hydraulic  
522 properties, regarding the long-term symptom history. We can conclude that the processes that  
523 generate tiger-stripe symptoms are largely restricted to the current year of the symptom  
524 expression. However, in plants expressing symptoms for the first time according to our disease  
525 record, these processes could require more time, as they showed symptoms only late in the  
526 season. The presence of occlusion, leading to hydraulic failure in stems, could exacerbate leaf  
527 symptom expression in the following seasons, possibly contributing to death. We could  
528 speculate that a stem expressing extensive hydraulic failure could be more prone to express  
529 symptoms in the following year or, in the worst cases, to die. If the level of hydraulic failure  
530 could affect the stem mortality in the following year, the choice of stems with a complete  
531 absence of failure during the winter pruning could reduce the impact of esca in vineyards. In  
532 addition, the presence of occlusions could also amplify plant susceptibility to drought-induced  
533 hydraulic failure, enhancing the risk of plant mortality in the field as suggested by McDowell  
534 *et al.* (2008). It could be speculated that a decrease in soil water potential or a high evaporative

535 demand, concomitant to esca-induced hydraulic failure, could embolize the remaining  
536 functional xylem vessels stopping the water flow and desiccating plant tissues (this could be  
537 the case in apoplectic plants for example). In perspective, future studies should investigate the  
538 link between pathogen activities and occlusion development, especially in trunks, and the  
539 subsequent hydraulic failure consequences on whole plant physiology.

540

## 541 **ACKNOWLEDGMENTS**

542 We thank the experimental teams of UMR SAVE and UMR EGFV (Bord'O platform, INRAE,  
543 Bordeaux, France) and the SOLEIL synchrotron facility (beamline PSICHE) for providing the  
544 materials and logistics. Specifically, we thank Jérôme Jolivet and Sebastien Gambier (UMR  
545 SAVE) for providing technical knowledge and support for plant transplantation and  
546 maintenance. This work was supported by the French Ministry of Agriculture, Agrifood, and  
547 Forestry (FranceAgriMer and CNIV) within the PHYSIOPATH project (program Plan  
548 National Déperissement du Vignoble, 22001150-1506) awarded to C.E.L.D., and program  
549 Investments for the Future (ANR-10-EQPX-16, XYLOFOREST).

550

551

## 552 **Author contributions**

553 C.E.L.D., G.A.G., G.B., and S.D. designed the experiments;  
554 E.F., G.A.G., S.D., E.B., R.B., H.C., A.K., L.J.L., J.M.T.-R., S.T. participated in synchrotron  
555 campaigns;  
556 G.B., C.E.L.D., E.F., and N.F. conducted the esca symptom notations;  
557 G.B., M.M.-M., and N.F. conducted the histological observations;  
558 E.F. conducted the hydraulic conductivity measurements and participated to data analyses;  
559 N.F., and J.P., conducted the pathogen detection;  
560 G.B. analyzed the microCT, optical images, and analyzed the data;  
561 P.L. provided data on disease history of the plants;  
562 G.B., C.E.L.D., and G.A.G. wrote the article;  
563 all authors edited and agreed on the last version of the article.

564

## 565 **Data Availability Statement**

566 We agree to archive the data associated with this manuscript should the manuscript be accepted.

## 567 REFERENCES

- 568 Akpaninyang, F. E., & Opara, E. U. (2017). The Influence of Toxins in Disease Symptom  
569 Initiation in Plants : A Review. *Journal of Agriculture and Sustainability*, 10(1), 29-52.
- 570 Aleemullah, M., & Walsh, K. (1996). Australian papaya dieback : Evidence against the calcium  
571 deficiency hypothesis and observations on the significance of laticifer autofluorescence.  
572 *Australian Journal of Agricultural Research*, 47(3), 371-385.  
573 <https://doi.org/10.1071/AR9960371>
- 574 Alvindia, D. G., & Gallema, F. L. M. (2017). *Lasiodiplodia theobromae* causes vascular streak  
575 dieback (VSD)-like symptoms of cacao in Davao Region, Philippines. *Australasian Plant*  
576 *Disease Notes*, 12(1). <https://doi.org/10.1007/s13314-017-0279-9>
- 577 Anderegg, W. R. L., Kane, J. M., & Anderegg, L. D. L. (2013). Consequences of widespread  
578 tree mortality triggered by drought and temperature stress. *Nature Climate Change*, 3(1),  
579 30-36. <https://doi.org/10.1038/nclimate1635>
- 580 Anderegg, W. R. L., Klein, T., Bartlett, M., Sack, L., Pellegrini, A. F. A., Choat, B., & Jansen,  
581 S. (2016). Meta-analysis reveals that hydraulic traits explain cross-species patterns of drought-  
582 induced tree mortality across the globe. *Proceedings of the National Academy of Sciences*,  
583 113(18), 5024-5029. <https://doi.org/10.1073/pnas.1525678113>
- 584 Andolfi, A., Mugnai, L., Luque, J., Surico, G., Cimmino, A., & Evidente, A. (2011).  
585 Phytotoxins Produced by Fungi Associated with Grapevine Trunk Diseases. *Toxins*, 3(12),  
586 1569-1605. <https://doi.org/10.3390/toxins3121569>
- 587 Beckman, C. H., & Roberts, E. M. (1995). On the Nature and Genetic Basis for Resistance and  
588 Tolerance to Fungal Wilt Diseases of Plants. In *Advances in Botanical Research* 21, 35-77.  
589 Elsevier. [https://doi.org/10.1016/S0065-2296\(08\)60008-7](https://doi.org/10.1016/S0065-2296(08)60008-7)
- 590 Beier, G. L., Held, B. W., Giblin, C. P., Cavender-Bares, J., & Blanchette, R. A. (2017).  
591 American elm cultivars : Variation in compartmentalization of infection by *Ophiostoma novo-*  
592 *ulmi* and its effects on hydraulic conductivity. *Forest Pathology*, 47(6), 1-11.  
593 <https://doi.org/10.1111/efp.12369>

- 594 Bettenfeld, P., Fontaine, F., Trouvelot, S., Fernandez, O., & Courty, P.-E. (2020). Woody Plant  
595 Declines. What's Wrong with the Microbiome? *Trends in Plant Science*, 25(4), 381-394.  
596 <https://doi.org/10.1016/j.tplants.2019.12.024>
- 597 Bensen, K. J. M., & Kučera, L. J. (1990). Vessel Occlusions in Plants: Morphological,  
598 Functional and Evolutionary Aspects. *IAWA Journal*, 11(4), 393-399.  
599 <https://doi.org/10.1163/22941932-90000528>
- 600 Bortolami, G., Gambetta, G. A., Delzon, S., Lamarque, L. J., Pouzoulet, J., Badel, E., Burlett,  
601 R., Charrier, G., Cochard, H., Dayer, S. et al. (2019). Exploring the Hydraulic Failure  
602 Hypothesis of Esca Leaf Symptom Formation. *Plant Physiology*, 181(3), 1163-1174.  
603 <https://doi.org/10.1104/pp.19.00591>
- 604 Brown, A. A., Lawrence, D. P., & Baumgartner, K. (2020). Role of basidiomycete fungi in the  
605 grapevine trunk disease esca. *Plant Pathology*, 69(2), 205-220.  
606 <https://doi.org/10.1111/ppa.13116>
- 607 Cailleret, M., Jansen, S., Robert, E. M. R., Desoto, L., Aakala, T., Antos, J. A., Beikircher, B.,  
608 Bigler, C., Bugmann, H., Caccianiga, M., et al. (2017). A synthesis of radial growth patterns  
609 preceding tree mortality. *Global Change Biology*, 23(4), 1675-1690.  
610 <https://doi.org/10.1111/gcb.13535>
- 611 Charrier, G., Delzon, S., Domec, J.-C., Zhang, L., Delmas, C. E. L., Merlin, I., Corso, D., King,  
612 A., Ojeda, H., Ollat, N., et al. (2018). Drought will not leave your glass empty: Low risk of  
613 hydraulic failure revealed by long-term drought observations in world's top wine regions.  
614 *Science Advances*, 4(1), 1-9 <https://doi.org/10.1126/sciadv.aao6969>
- 615 Charrier, G., Torres-Ruiz, J. M., Badel, E., Burlett, R., Choat, B., Cochard, H., Delmas, C. E.  
616 L., Domec, J.-C., Jansen, S., King, A., et al. (2016). Evidence for Hydraulic Vulnerability  
617 Segmentation and Lack of Xylem Refilling under Tension. *Plant Physiology*, 172(3),  
618 1657-1668. <https://doi.org/10.1104/pp.16.01079>
- 619 Claverie, M., Notaro, M., Fontaine, F., & Wery, J. (2020). Current knowledge on Grapevine  
620 Trunk Diseases with complex etiology : A systemic approach. *Phytopathologia Mediterranea*,  
621 59, 29-53. <https://doi.org/10.14601/Phyto-11150>

- 622 Clérivet, A., Déon, V., Alami, I., Lopez, F., Geiger, J.-P., & Nicole, M. (2000). Tyloses and  
623 gels associated with cellulose accumulation in vessels are responses of plane tree seedlings  
624 (*Platanus × acerifolia*) to the vascular fungus *Ceratocystis fimbriata* f. *Sp platani*. *Trees*, *15*(1),  
625 25-31. <https://doi.org/10.1007/s004680000063>
- 626 Cloete, M., Mostert, L., Fischer, M., & Halleen, F. (2015). Pathogenicity of South African  
627 Hymenochaetales taxa isolated from esca-infected grapevines. *Phytopathologia Mediterranea*,  
628 *54*(2), 368-379. [https://doi.org/10.14601/Phytopathol\\_Mediterr-16237](https://doi.org/10.14601/Phytopathol_Mediterr-16237)
- 629 Collins, B. R., Parke, J. L., Lachenbruch, B., & Hansen, E. M. (2009). The effects of  
630 *Phytophthora ramorum* infection on hydraulic conductivity and tylosis formation in tanoak  
631 sapwood. *Canadian Journal of Forest Research*, *39*(9), 1766-1776.  
632 <https://doi.org/10.1139/X09-097>
- 633 Desprez-Loustau, M.-L., Marçais, B., Nageleisen, L.-M., Piou, D., & Vannini, A. (2006).  
634 Interactive effects of drought and pathogens in forest trees. *Annals of Forest Science*, *63*(6),  
635 597-612. <https://doi.org/10.1051/forest:2006040>
- 636 Deyett, E., Pouzoulet, J., Yang, J. -I., Ashworth, V. E., Castro, C., Roper, M. C., & Rolshausen,  
637 P. E. (2019). Assessment of Pierce's disease susceptibility in *Vitis vinifera* cultivars with  
638 different pedigrees. *Plant Pathology*, *68*(6), 1079-1087. <https://doi.org/10.1111/ppa.13027>
- 639 De Micco, V., Balzano, A., Wheeler, E. A., & Baas, P. (2016). Tyloses and gums : A review  
640 of structure, function and occurrence of vessel occlusions. *IAWA Journal*, *37*(2), 186-205.  
641 <https://doi.org/10.1163/22941932-20160130>
- 642 Elgersma, D. M. (1970). Length and diameter of xylem vessels as factors in resistance of elms  
643 to *Ceratocystis ulmi*. *Netherlands Journal of Plant Pathology*, *76*(3), 179-182.  
644 <https://doi.org/10.1007/BF01974328>
- 645 Eskalen, A., Stouthamer, R., Lynch, S. C., Rugman-Jones, P. F., Twizeyimana, M., Gonzalez,  
646 A., & Thibault, T. (2013). Host Range of *Fusarium Dieback* and Its *Ambrosia Beetle*  
647 (Coleoptera: Scolytinae) Vector in Southern California. *Plant Disease*, *97*(7), 938-951.  
648 <https://doi.org/10.1094/PDIS-11-12-1026-RE>
- 649 Et-Touil, A., Rioux, D., Mathieu, F. M., & Bernier, L. (2005). External symptoms and  
650 histopathological changes following inoculation of elms putatively resistant to Dutch elm

651 disease with genetically close strains of *Ophiostoma*. *Canadian Journal of Botany*, 83, 656–  
652 667.

653 Fallon, B., Yang, A., Lapadat, C., Armour, I., Juzwik, J., Montgomery, R. A., & Cavender-  
654 Bares, J. (2020). Spectral differentiation of oak wilt from foliar fungal disease and drought is  
655 correlated with physiological changes. *Tree Physiology*, 40(3), 377-390.  
656 <https://doi.org/10.1093/treephys/tpaa005>

657 Fradin, E. F., & Thomma, B. P. H. J. (2006). Physiology and molecular aspects of *Verticillium*  
658 wilt diseases caused by *V. dahliae* and *V. albo-atrum*. *Molecular Plant Pathology*, 7(2), 71-86.  
659 <https://doi.org/10.1111/j.1364-3703.2006.00323.x>

660 Gärtner, H., Lucchinetti, S., & Schweingruber, F. H. (2014). New perspectives for wood  
661 anatomical analysis in dendrosciences: the GSL1-microtome. *Dendrochronologia*, 32(1), 47-  
662 51. <https://doi.org/10.1016/j.dendro.2013.07.002>

663 Goberville, E., Hautekèete, N.-C., Kirby, R. R., Piquot, Y., Luczak, C., & Beaugrand, G.  
664 (2016). Climate change and the ash dieback crisis. *Scientific Reports*, 6(1).  
665 <https://doi.org/10.1038/srep35303>

666 Guérard, N., Maillard, P., Bréchet, C., Lieutier, F., & Dreyer, E. (2007). Do trees use reserve  
667 or newly assimilated carbon for their defense reactions? A <sup>13</sup>C labeling approach with young  
668 Scots pines inoculated with a bark-beetle-associated fungus (*Ophiostoma brunneo ciliatum*).  
669 *Annals of Forest Science*, 64(6), 601-608. <https://doi.org/10.1051/forest:2007038>

670 Guerin-Dubrana, L., Labenne, A., Labrousse, J. C., Bastien, S., Rey, P., & Gegout-Petit, A.  
671 (2013). Statistical analysis of grapevine mortality associated with esca or Eutypa dieback foliar  
672 expression. *Phytopathologia Mediterranea*, 52(2), 276-288.

673 Guerin-Dubrana, L., Fontaine, F., & Mugnai, L. (2019). Grapevine trunk disease in European  
674 and Mediterranean vineyards: Occurrence, distribution and associated disease-affecting  
675 cultural factors. *Phytopathologia Mediterranea*, 58(1), 49-71.  
676 [https://doi.org/10.14601/Phytopathol\\_Mediterr-25153](https://doi.org/10.14601/Phytopathol_Mediterr-25153)

677 Hochberg, U., Albuquerque, C., Rachmilevitch, S., Cochard, H., David-Schwartz, R.,  
678 Brodersen, C. R., McElrone, A., & Windt, C. W. (2016). Grapevine petioles are more sensitive  
679 to drought induced embolism than stems: Evidence from *in vivo* MRI and microcomputed

- 680 tomography observations of hydraulic vulnerability segmentation: Hydraulic vulnerability  
681 segmentation in grapevine. *Plant, Cell & Environment*, 39(9), 1886-1894.  
682 <https://doi.org/10.1111/pce.12688>
- 683 Hochberg, U., Windt, C. W., Ponomarenko, A., Zhang, Y.-J., Gersony, J., Rockwell, F. E., &  
684 Holbrook, N. M. (2017). Stomatal Closure, Basal Leaf Embolism, and Shedding Protect the  
685 Hydraulic Integrity of Grape Stems. *Plant Physiology*, 174(2), 764-775.  
686 <https://doi.org/10.1104/pp.16.01816>
- 687 Jacobi, W. R., & MacDonald, W. L. (1980). Colonization of resistant and susceptible oaks by  
688 *Ceratocystis fagacearum*. *Phytopathology*, 70(7), 618-623.
- 689 King, A., Guignot, N., Zerbino, P., Boulard, E., Desjardins, K., Bordessoule, M., Leclercq, N.,  
690 Le, S., Renaud, G., Cerato, M., Bornert, M., et al. (2016). Tomography and imaging at the  
691 PSICHE beam line of the SOLEIL synchrotron. *Review of Scientific Instruments*, 87(9),  
692 093704. <https://doi.org/10.1063/1.4961365>
- 693 Lachenbruch, B., & Zhao, J.-P. (2019). Effects of phloem on canopy dieback, tested with  
694 manipulations and a canker pathogen in the *Corylus avellana*/*Anisogramma anomala*  
695 host/pathogen system. *Tree Physiology*, 39(7), 1086-1098.  
696 <https://doi.org/10.1093/treephys/tpz027>
- 697 Lecomte, P., Darrietort, G., Liminana, J.-M., Comont, G., Muruamendiaraz, A., Legorburu,  
698 F.-J., Choueiri, E., Jreijiri, F., El Amil, R., & Fermaud, M. (2012). New Insights into Esca of  
699 Grapevine: The Development of Foliar Symptoms and Their Association with Xylem  
700 Discoloration. *Plant Disease*, 96(7), 924-934. <https://doi.org/10.1094/PDIS-09-11-0776-RE>
- 701 Li, S., Bonneau, F., Chadoeuf, J., Picart, D., Gégout-Petit, A., & Guérin-Dubrana, L. (2017).  
702 Spatial and Temporal Pattern Analyses of Esca Grapevine Disease in Vineyards in France.  
703 *Phytopathology*, 107(1), 59-69. <https://doi.org/10.1094/PHTO-07-15-0154-R>
- 704 Martin, N., Vesentini, D., Rego, C., Monteiro, S., Oliveira, H., & Ferreira, R. B. (2009).  
705 *Phaeomoniella chlamydospora* infection induces changes in phenolic compounds content in  
706 *Vitis vinifera*. *Phytopathologia Mediterranea*, 48(1), 101-116.  
707 [http://dx.doi.org/10.14601/Phytopathol\\_Mediterr-2879](http://dx.doi.org/10.14601/Phytopathol_Mediterr-2879)



- 708 Martín, J. A., Solla, A., Ruiz-Villar, M., & Gil, L. (2013). Vessel length and conductivity of  
709 *Ulmus* branches : Ontogenetic changes and relation to resistance to Dutch elm disease. *Trees*,  
710 27(5), 1239-1248. <https://doi.org/10.1007/s00468-013-0872-2>
- 711 McDowell, N., Pockman, W. T., Allen, C. D., Breshears, D. D., Cobb, N., Kolb, T., Plaut, J.,  
712 Sperry, J., West, A., Williams, D. G., & Yezzer, E. A. (2008). Mechanisms of plant survival  
713 and mortality during drought : Why do some plants survive while others succumb to drought?  
714 *New Phytologist*, 178(4), 719-739. <https://doi.org/10.1111/j.1469-8137.2008.02436.x>
- 715 McElrone, A. J., Sherald, J. L., & Forseth, I. N. (2003). Interactive effects of water stress and  
716 xylem-limited bacterial infection on the water relations of a host vine. *Journal of Experimental*  
717 *Botany*, 54(381), 419-430. <https://doi.org/10.1093/jxb/erg046>
- 718 McElrone, A. J., Jackson, S., & Habdas, P. (2008). Hydraulic disruption and passive migration  
719 by a bacterial pathogen in oak tree xylem. *Journal of Experimental Botany*, 59(10), 2649-2657.  
720 <https://doi.org/10.1093/jxb/ern124>
- 721 McNabb, H. S., Heybroek, H. M., & Macdonald, W. L. (1970). Anatomical factors in resistance  
722 to Dutch elm disease. *Netherlands Journal of Plant Pathology*, 76(3), 196-205.  
723 <https://doi.org/10.1007/BF01974331>
- 724 Mensah, J. K., Sayer, M. A. S., Nadel, R. L., Matusick, G., & Eckhardt, L. G. (2020).  
725 Physiological response of *Pinus taeda* L. trees to stem inoculation with *Leptographium*  
726 *terebrantis*. *Trees*. <https://doi.org/10.1007/s00468-020-01965-0>
- 727 Mirone, A., Brun, E., Gouillart, E., Tafforeau, P., & Kieffer, J. (2014). The PyHST2 hybrid  
728 distributed code for high speed tomographic reconstruction with iterative reconstruction and a  
729 priori knowledge capabilities. *Nuclear Instruments and Methods in Physics Research Section*  
730 *B: Beam Interactions with Materials and Atoms*, 324, 41-48.  
731 <https://doi.org/10.1016/j.nimb.2013.09.030>
- 732 Morales-Cruz, A., Allenbeck, G., Figueroa-Balderas, R., Ashworth, V. E., Lawrence, D. P.,  
733 Travadon, R., Smith, R. J., Baumgartner, K., Rolshausen, P. E., & Cantu, D. (2018). Closed-  
734 reference metatranscriptomics enables *in planta* profiling of putative virulence activities in the  
735 grapevine trunk disease complex : Transcriptomics of pathogen communities. *Molecular Plant*  
736 *Pathology*, 19(2), 490-503. <https://doi.org/10.1111/mpp.12544>

- 737 Mugnai, L., Graniti, A., & Surico, G. (1999). Esca (Black Measles) and Brown Wood-  
738 Streaking : Two Old and Elusive Diseases of Grapevines. *Plant Disease*, 83(5), 404-418.  
739 <https://doi.org/10.1094/PDIS.1999.83.5.404>
- 740 Ouadi, L., Bruez, E., Bastien, S., Vallance, J., Lecomte, P., Domec, J.-C., & Rey, P. (2019).  
741 Ecophysiological impacts of Esca, a devastating grapevine trunk disease, on *Vitis vinifera* L.  
742 *PLOS ONE*, 14(9), 1-20. <https://doi.org/10.1371/journal.pone.0222586>
- 743 Ouellette, G. B., Baayen, R. P., Simard, M., & Rioux, D. (1999). Ultrastructural and  
744 cytochemical study of colonization of xylem vessel elements of susceptible and resistant  
745 *Dianthus caryophyllus* by *Fusarium oxysporum* f.sp. *Dianthi*. *Can. J. Bot.*, 77, 644-663.
- 746 Paganin, D., Mayo, S. C., Gureyev, T. E., Miller, P. R., & Wilkins, S. W. (2002). Simultaneous  
747 phase and amplitude extraction from a single defocused image of a homogeneous object.  
748 *Journal of Microscopy*, 206(1), 33-40. <https://doi.org/10.1046/j.1365-2818.2002.01010.x>
- 749 Pandey, S., Rishi, R. R., Jayaraj, R., Giri, K., Kumar, R., Pandey, A., Juwantha, R., Madaan,  
750 S., & Bhandari, M. S. (2019). *Fusarium equiseti* is associated with the wilt and dieback of  
751 *Aquilaria malaccensis* in Northeast India. *Forest Pathology*, 49(2), e12489.  
752 <https://doi.org/10.1111/efp.12489>
- 753 Park, J.-H., & Juzwik, J. (2014). *Ceratocystis smalleyi* colonization of bitternut hickory and  
754 host responses in the xylem. *Forest Pathology*, 44(4), 282-292.  
755 <https://doi.org/10.1111/efp.12098>
- 756 Parke, J. L., Oh, E., Voelker, S., Hansen, E. M., Buckles, G., & Lachenbruch, B. (2007).  
757 *Phytophthora ramorum* Colonizes Tanoak Xylem and Is Associated with Reduced Stem Water  
758 Transport. *Phytopathology*, 97(12), 1558-1567. <https://doi.org/10.1094/PHYTO-97-12-1558>
- 759 Pearce, R. B. (1996). Antimicrobial defences in the wood of living trees. *New Phytologist*,  
760 132(2), 203-233. <https://doi.org/10.1111/j.1469-8137.1996.tb01842.x>
- 761 Pérez-Donoso, A. G., Lenhof, J. J., Pinney, K., & Labavitch, J. M. (2016). Vessel embolism  
762 and tyloses in early stages of Pierce's disease. *Australian Journal of Grape and Wine Research*,  
763 22(1), 81-86. <https://doi.org/10.1111/ajgw.12178>

- 764 Pita, P., Rodríguez-Calcerrada, J., Medel, D., & Gil, L. (2018). Further insights into the  
765 components of resistance to *Ophiostoma novo-ulmi* in *Ulmus minor*: Hydraulic conductance,  
766 stomatal sensitivity and bark dehydration. *Tree Physiology*, 38(2), 252-262.  
767 <https://doi.org/10.1093/treephys/tpx123>
- 768 Pouzoulet, J., Mailhac, N., Couderc, C., Besson, X., Daydé, J., Lummerzheim, M., & Jacques,  
769 A. (2013). A method to detect and quantify *Phaeomoniella chlamydospora* and  
770 *Phaeoacremonium aleophilum* DNA in grapevine-wood samples. *Applied Microbiology and*  
771 *Biotechnology*, 97(23), 10163-10175. <https://doi.org/10.1007/s00253-013-5299-6>
- 772 Pouzoulet, J., Scudiero, E., Schiavon, M., & Rolshausen, P. E. (2017). Xylem Vessel Diameter  
773 Affects the Compartmentalization of the Vascular Pathogen *Phaeomoniella chlamydospora* in  
774 Grapevine. *Frontiers in Plant Science*, 8, 1-13. <https://doi.org/10.3389/fpls.2017.01442>
- 775 Pouzoulet, J., Scudiero, E., Schiavon, M., Santiago, L. S., & Rolshausen, P. E. (2019).  
776 Modeling of xylem vessel occlusion in grapevine. *Tree Physiology*, 39(8), 1438-1445.  
777 <https://doi.org/10.1093/treephys/tpz036>
- 778 Pouzoulet, J., Rolshausen, P. E., Charbois, R., Chen, J., Guillaumie, S., Ollat, N., Gambetta,  
779 G. A., & Delmas, C. E. L. (2020). Behind the Curtain of the Compartmentalization Process :  
780 Exploring How Xylem Vessel Diameter Impacts Vascular Pathogen Resistance. *Plant, Cell &*  
781 *Environment*. <https://doi.org/10.1111/pce.13848>
- 782 Pratt, R. B., & Jacobsen, A. L. (2018). Identifying which conduits are moving water in woody  
783 plants: A new HRCT-based method. *Tree Physiology*, 38(8), 1200-1212.  
784 <https://doi.org/10.1093/treephys/tpy034>
- 785 Rioux, D., Blais, M., Nadeau-Thibodeau, N., Lagacé, M., DesRochers, P., Klimaszewska, K.,  
786 & Bernier, L. (2018). First Extensive Microscopic Study of Butternut Defense Mechanisms  
787 Following Inoculation with the Canker Pathogen *Ophiognomonia clavignenti-*  
788 *juglandacearum* Reveals Compartmentalization of Tissue Damage. *Phytopathology*, 108(11),  
789 1237-1252. <https://doi.org/10.1094/PHYTO-03-18-0076-R>
- 790 Salle, A., Ye, H., Yart, A., & Lieutier, F. (2008). Seasonal water stress and the resistance of  
791 *Pinus yunnanensis* to a bark-beetle-associated fungus. *Tree Physiology*, 28(5), 679-687.  
792 <https://doi.org/10.1093/treephys/28.5.679>

- 793 Salleo, S., Nardini, A., Lo Gullo, M. A., & Ghirardelli, L. A. (2002). Changes in stem and leaf  
794 hydraulics preceding leaf shedding in *Castanea sativa* L. *Biologia plantarum*, *45*(2), 227-234.  
795 <https://doi.org/10.1023/A:1015192522354>
- 796 Schneider, C. A., Rasband, W. S., & Eliceiri, K. W. (2012). NIH Image to ImageJ : 25 years of  
797 image analysis. *Nature Methods*, *9*(7), 671-675. <https://doi.org/10.1038/nmeth.2089>
- 798 Sperry, J. S., Donnelly, J. R., & Tyree, M. T. (1988). A method for measuring hydraulic  
799 conductivity and embolism in xylem. *Plant, Cell and Environment*, *11*(1), 35-40.  
800 <https://doi.org/10.1111/j.1365-3040.1988.tb01774.x>
- 801 Solla, A., & Gil, L. (2002). Xylem vessel diameter as a factor in resistance of *Ulmus minor* to  
802 *Ophiostoma novo-ulmi*. *Forest Pathology*, *32*(2), 123-134. <https://doi.org/10.1046/j.1439-0329.2002.00274.x>
- 804 Sun, Q., Rost, T. L., & Matthews, M. A. (2008). Wound-induced vascular occlusions in *Vitis*  
805 *vinifera* (Vitaceae): Tyloses in summer and gels in winter. *American Journal of Botany*,  
806 *95*(12), 1498-1505. <https://doi.org/10.3732/ajb.0800061>
- 807 Sun, Q., Sun, Y., Walker, M. A., & Labavitch, J. M. (2013). Vascular Occlusions in Grapevines  
808 with Pierce's Disease Make Disease Symptom Development Worse. *Plant Physiology*, *161*(3),  
809 1529-1541. <https://doi.org/10.1104/pp.112.208157>
- 810 Surico, G., Marchi, G., Ferrandino, A., Braccini, P., & Mugnai, L. (2000). Analysis of the  
811 spatial spread of esca in some Tuscan vineyards (Italy). *Phytopathologia Mediterranea*, *39*,  
812 211-224.
- 813 Talboys, P. W. (1972). Resistance to Vascular Wilt Fungi. *Proceedings of the Royal Society of*  
814 *London. Series B, Biological Sciences*, *181*(1064), 319-332.
- 815 Torres-Ruiz, J. M., Sperry, J. S., & Fernández, J. E. (2012). Improving xylem hydraulic  
816 conductivity measurements by correcting the error caused by passive water uptake. *Physiologia*  
817 *Plantarum*, *146*(2), 129-135. <https://doi.org/10.1111/j.1399-3054.2012.01619.x>
- 818 Tyree, M T, & Sperry, J. S. (1989). Vulnerability of Xylem to Cavitation and Embolism. *Annu.*  
819 *Rev. Plant. Physiol. Plant. Mol. Biol.*, *20*.

- 820 Tyree, Melvin T., & Ewers, F. W. (1991). The hydraulic architecture of trees and other woody  
821 plants. *New Phytologist*, 119(3), 345-360. <https://doi.org/10.1111/j.1469-8137.1991.tb00035.x>
- 822 Úrbez-Torres, J. R., Peduto, F., Vossen, P. M., Krueger, W. H., & Gubler, W. D. (2013). Olive  
823 Twig and Branch Dieback : Etiology, Incidence, and Distribution in California. *Plant Disease*,  
824 97(2), 231-244. <https://doi.org/10.1094/PDIS-04-12-0390-RE>
- 825 Venturas, M., López, R., Martín, J. A., Gascó, A., & Gil, L. (2014). Heritability of *Ulmus minor*  
826 resistance to Dutch elm disease and its relationship to vessel size, but not to xylem vulnerability  
827 to drought. *Plant Pathology*, 63(3), 500-509. <https://doi.org/10.1111/ppa.12115>
- 828 Yadeta, K. A., & J. Thomma, B. P. H. (2013). The xylem as battleground for plant hosts and  
829 vascular wilt pathogens. *Frontiers in Plant Science*, 4. <https://doi.org/10.3389/fpls.2013.00097>
- 830 Yazaki, K., Takanashi, T., Kanzaki, N., Komatsu, M., Levia, D. F., Kabeya, D., Tobita, H.,  
831 Kitao, M., & Ishida, A. (2018). Pine wilt disease causes cavitation around the resin canals and  
832 irrecoverable xylem conduit dysfunction. *Journal of Experimental Botany*, 69(3), 589-602.  
833 <https://doi.org/10.1093/jxb/erx417>
- 834 Zimmermann, M. H. (1979). The Discovery of Tylose Formation by a Viennese lady in 1845.  
835 *IAWA Bulletin*, 2, 51-56.

836 **SUPPORTING INFORMATION**

837 The following Supporting Information is available for this article:

838 **Method S1:** Image analysis of microCT scans.

839 **Method S2.** Specific stem hydraulic conductivity ( $k_s$ ) measurements.

840 **Fig. S1 (a-d).** Two-dimensional reconstruction of longitudinal cross sections from X-ray  
841 microCT volumes of grapevine stems.

842 **Fig. S2.** Relationship between  $k_s$  and  $k_{th}$  in control plants.

843 **Fig. S3.** Vessel density and percentage of occluded vessels in tiger-stripe stems for different  
844 vessel diameter classes.

845 **Fig. S4.** Relationships between  $k_s$  and  $k_{th}$  in each stem symptom category.

846 **Table S1.** Effect of year of uprooting, internode analyzed, and sampling date on  $k_s$  and  $k_{th}$  in  
847 control stems.

848 **Table S2.** Calculated theoretical hydraulic conductivity ( $k_{th}$  %), and hydraulic conductivity loss  
849 (PLC %) from X-ray microCT volumes of intact grapevine stems.

850 FIGURES

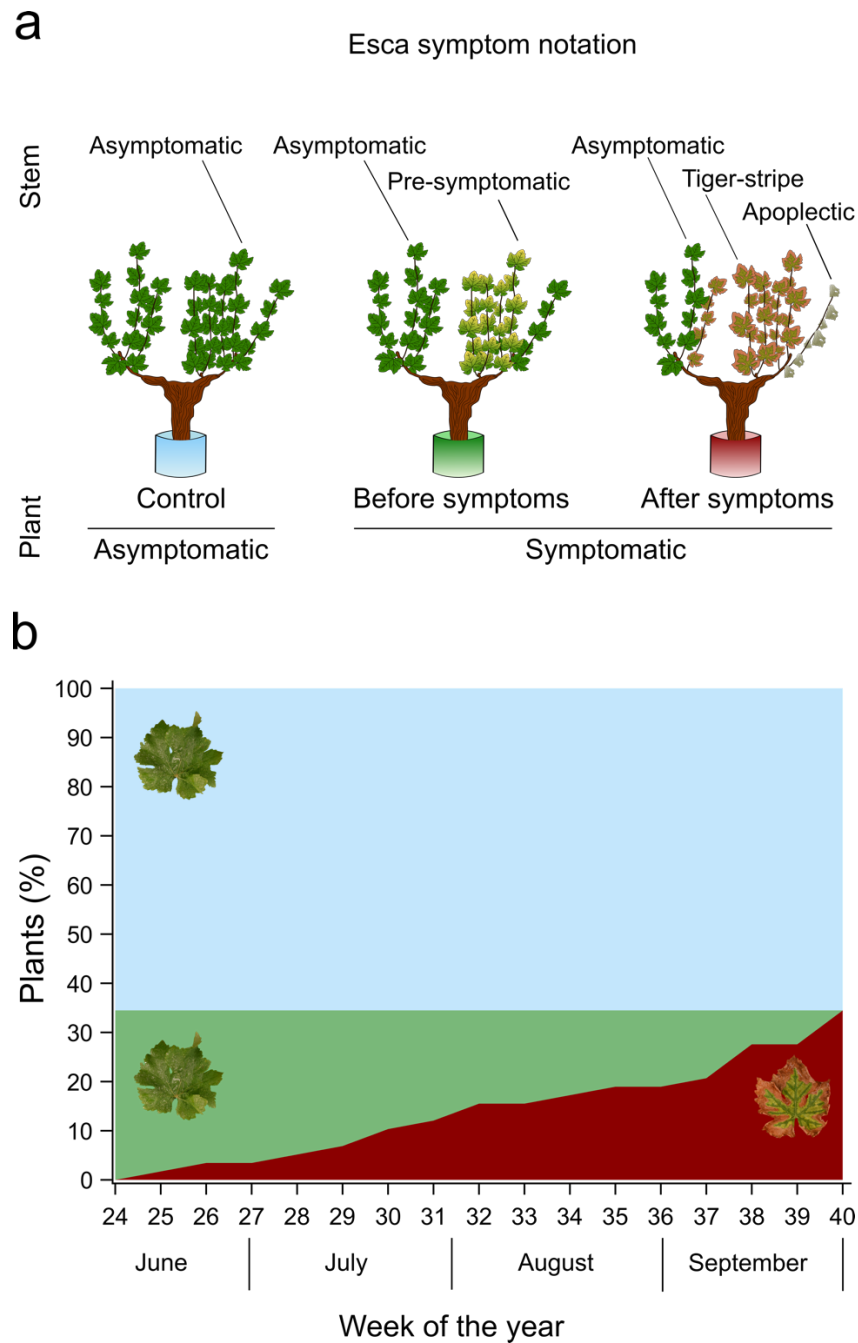

851

852 **Fig. 1 (a-b).** Representation of esca symptom notation during the experimental season. (a)  
853 Single stems could be noted as esca asymptomatic, pre-symptomatic, tiger-stripe, or apoplectic.  
854 Whole plants have been noted as control (asymptomatic from June to October) or symptomatic  
855 (with tiger-stripe symptoms at the end of the season). (b) Proportion of plants in each symptom  
856 category over the experimental season (n=58). The blue area corresponds to control plants,  
857 green area to esca symptomatic plants before symptom appearance, and red area to esca  
858 symptomatic plants.

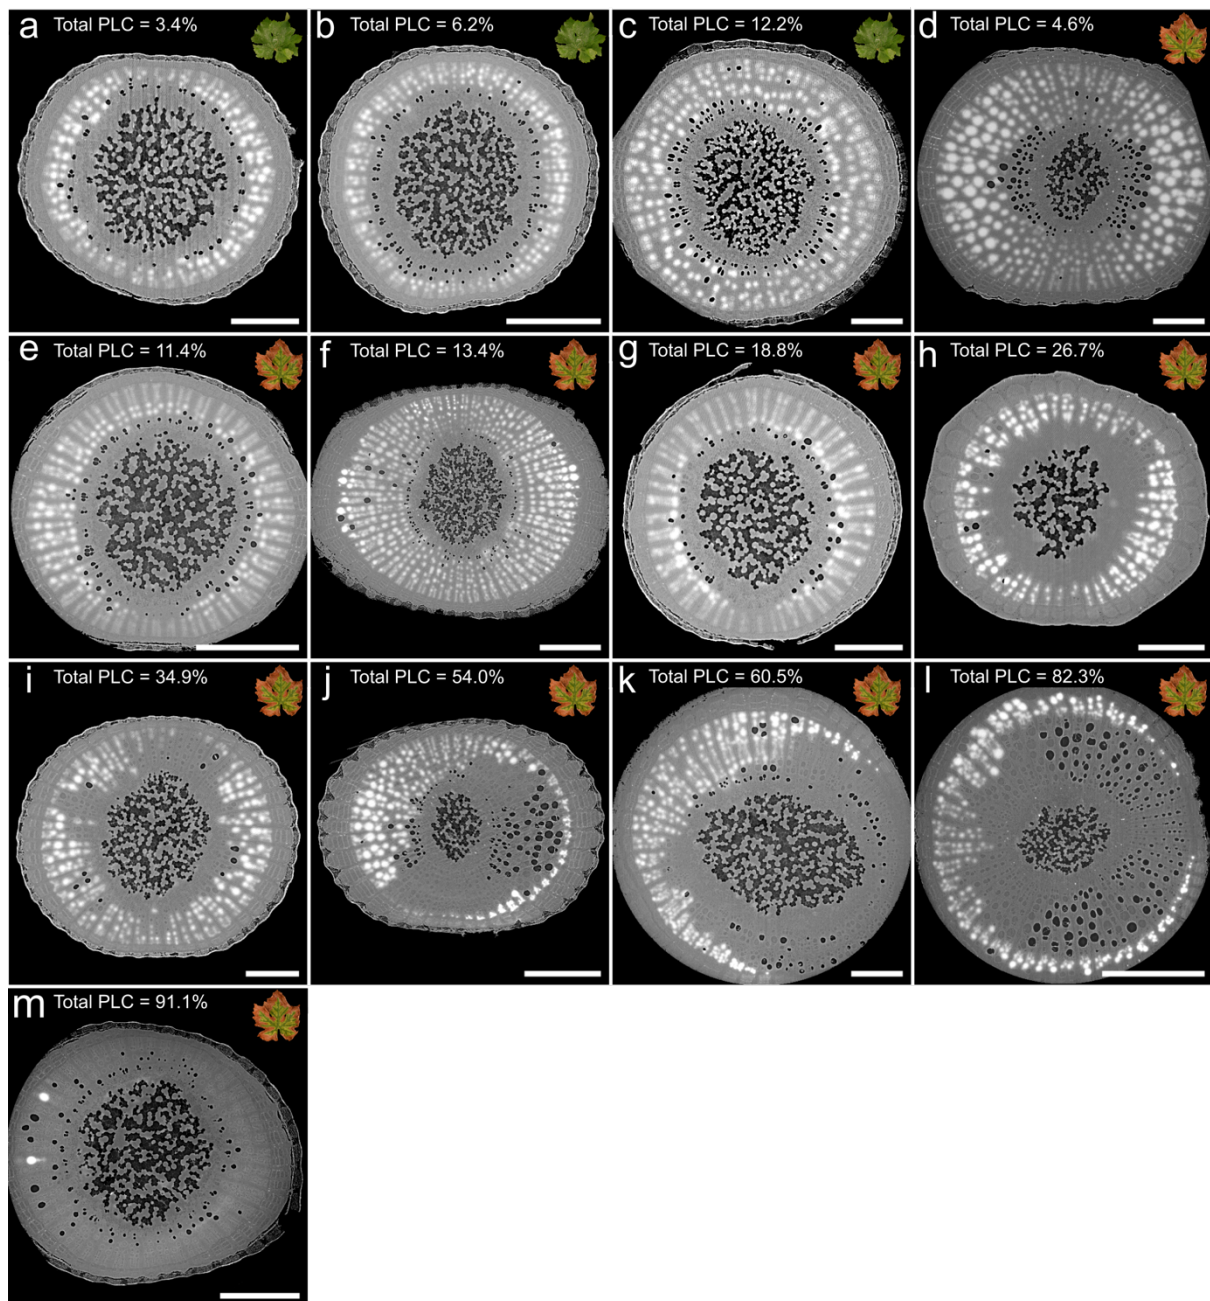

860 **Fig. 2 (a-m).** Two-dimensional reconstruction of cross-sections from X-ray microCT volumes  
861 of grapevine stems. Each panel represents a cross section of different stems for control (a-c)  
862 and esca symptomatic (d-m) plants. Iohexol appears white bright in functional vessels; air-  
863 filled vessels (i.e. native PLC) appear black; occluded vessels (i.e. occlusion PLC) appear grey.  
864 Total PLC (i.e. native PLC plus occlusion PLC) values are given for the presented samples.  
865 Scale bars = 1000 $\mu$ m.

866

867



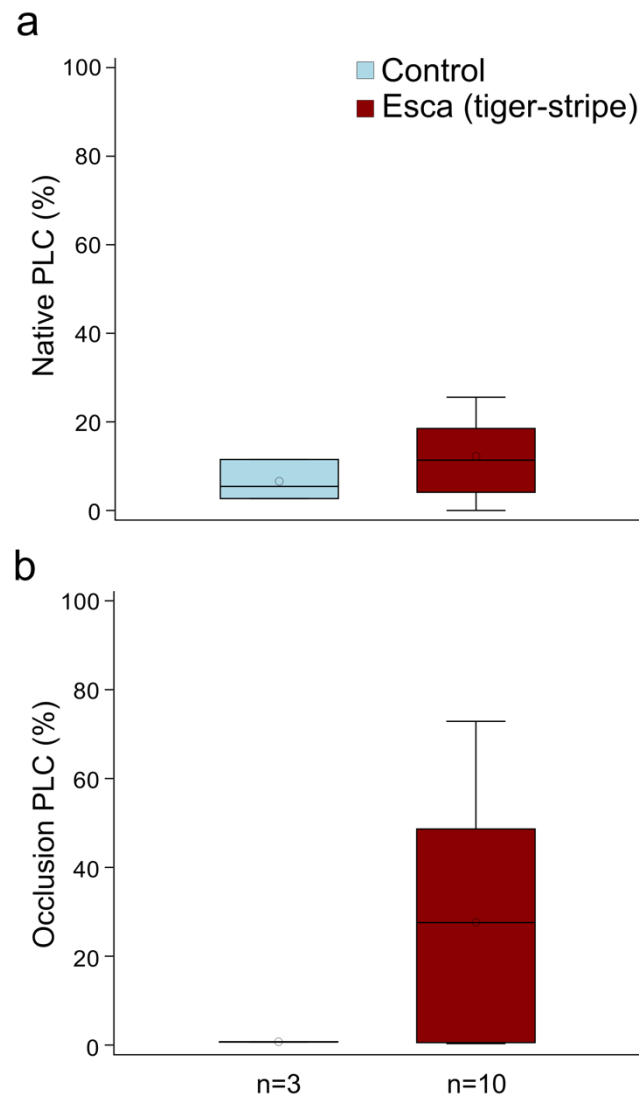

868

869 **Fig. 3 (a-b).** (a) Mean values of native PLC in control (blue) and esca tiger-stripe (red) stems  
870 of grapevine plants using X-ray microCT imaging. Differences were not significant (n=13,  
871  $F_{1,9}=0.07$ ,  $P=0.79$ ). (b) Mean values of occlusion PLC in control (blue) and esca tiger-stripe  
872 (red) stems of grapevine plants using X-ray microCT imaging. Differences were not significant  
873 (n=13,  $F_{1,9}=0.33$ ,  $P=0.58$ ). Boxes and bars show the median, quartiles and extreme values,  
874 circles show mean values. N represents the sample size (number of analyzed stems) for each  
875 group.

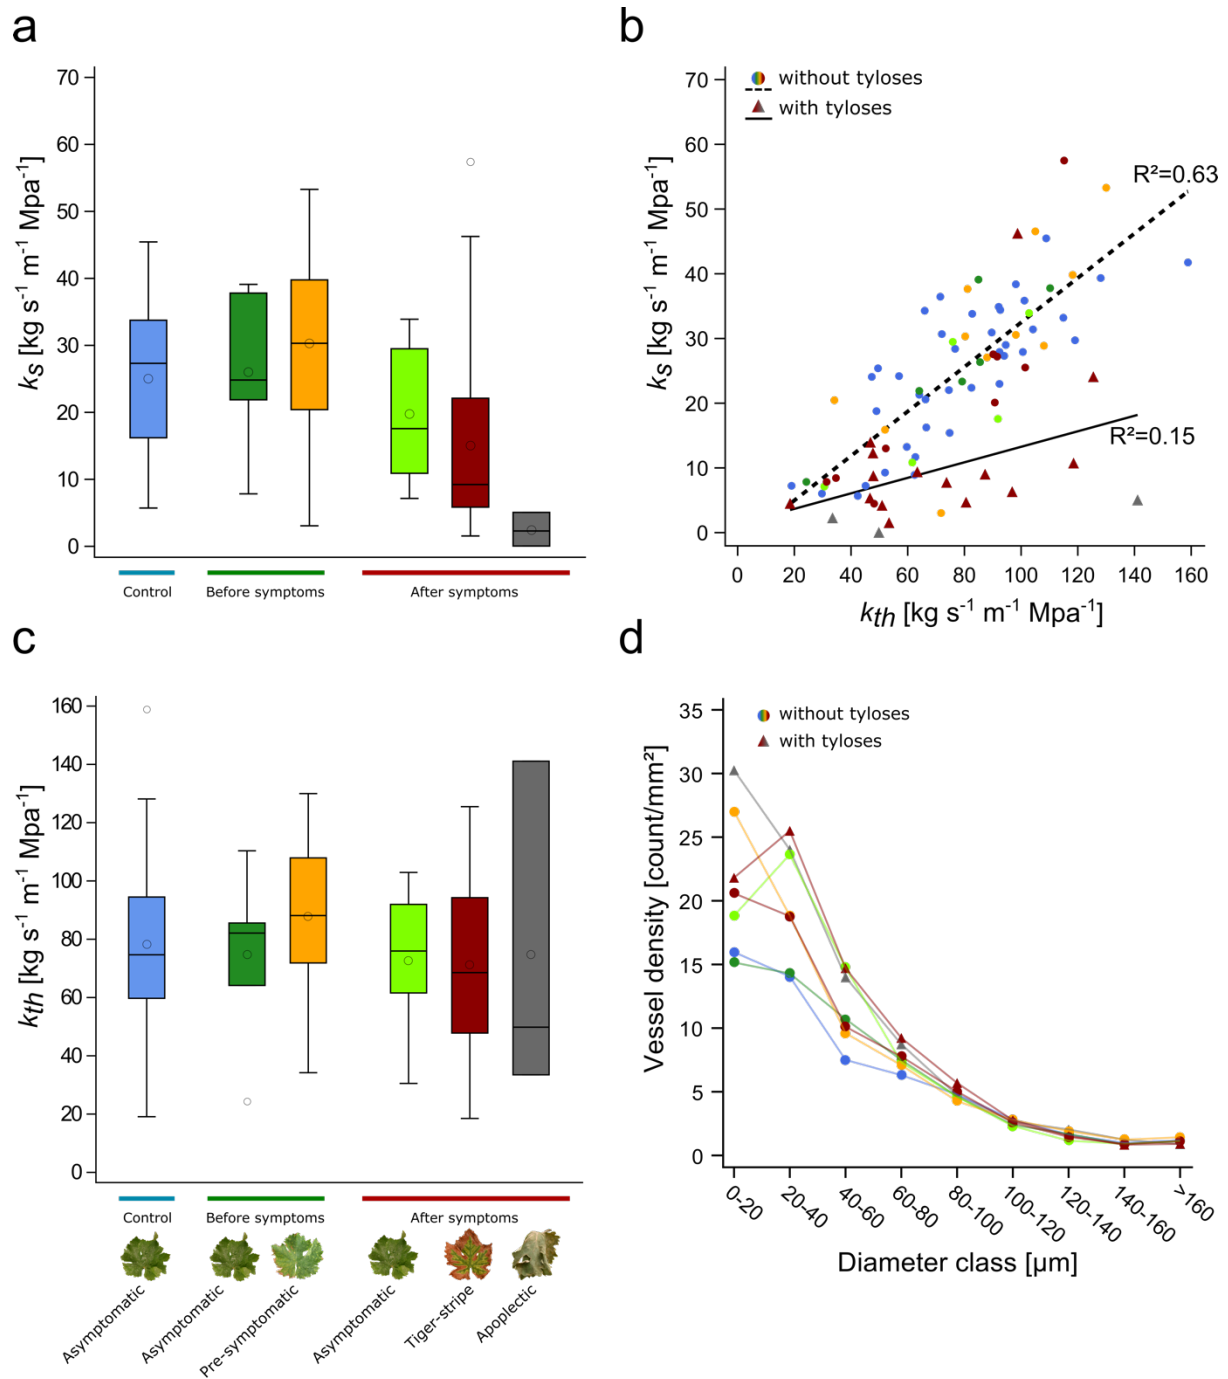

876

877 **Fig. 4 (a-d).** Relationships between specific stem hydraulic conductivity ( $k_s$ ), theoretical stem  
 878 hydraulic conductivity ( $k_{th}$ ), and vessel density in control and esca symptomatic grapevine  
 879 plants. **(a)**  $k_s$  values for control (blue); asymptomatic (dark green) and pre-symptomatic  
 880 (yellow) stems in plants before symptom appearance; asymptomatic (light green), tiger-stripe  
 881 (red), and apoplectic (grey) stems in plants after symptom appearance, differences were not  
 882 significant ( $n=88$ ,  $F_{5,45}=1.30$   $P=0.28$ ). Boxes and bars show the median, quartiles and extreme  
 883 values, circles within boxes correspond to means, and circles outside boxes to outlier values.  
 884 **(b)** Relationships between  $k_s$  and  $k_{th}$ . Symbols represent the absence (circles) or presence

885 (triangles) of tyloses in xylem vessels. Colors represent esca symptomatology (as in panel a).  
886 The dashed line represents the regression for stems in which no tyloses were observed in xylem  
887 vessels, and the solid line represents the regression for samples with tyloses.  $R^2$  for the  
888 regression lines are indicated (see Table 2 and Fig. S4 for detailed analyses). **(c)**  $k_{th}$  values for  
889 the different stem categories as presented in panel a. Differences were not significant ( $n=88$ ,  
890  $F_{5,45}=0.58$ ,  $P=0.71$ ). **(d)** Relationships between mean values of xylem vessel density and their  
891 diameters. Differences in total vessel density and in vessel size distributions were not  
892 significant ( $n=88$ ,  $F_{6,45}=0.77$ ,  $P=0.60$ ;  $n=792$  (88 samples for 9 vessel classes),  $F_{48,693}=1.19$ ,  
893  $P=0.18$ ). Colors and markers are the same as panel b.

894 **TABLES**

895

896 **Table 1.** Esca leaf symptom observations over the experimental season on *Vitis vinifera* cv  
897 Sauvignon blanc.

| <b>Symptom notation<br/>before 2019</b> | <b>All plants</b> | <b>Previously<br/>asymptomatic (pA)</b> | <b>Previously<br/>symptomatic (pS)</b> |
|-----------------------------------------|-------------------|-----------------------------------------|----------------------------------------|
| <b>Symptom notation in 2019</b>         |                   |                                         |                                        |
| Esca-symptomatic                        | 35 % (20/58)      | 30 % (6/20)                             | 37 % (14/38)                           |
| Control-asymptomatic                    | 65 % (38/58)      | 70 % (14/20)                            | 63 % (24/38)                           |

898 Plants are grouped by their symptom history: previously asymptomatic (pA, plants that have  
899 never expressed leaf symptoms between 2012 and 2018) and previously symptomatic (pS,  
900 plants that have expressed leaf symptoms at least once since 2012). Ratios present the number  
901 of plants in each symptom category (esca-symptomatic or control-asymptomatic) over the total  
902 number of plants of the category.

903 **Table 2.** Values for specific stem hydraulic conductivity ( $k_s$ ), theoretical stem hydraulic  
 904 conductivity ( $k_{th}$ ) and equations of regression lines between  $k_s$  and  $k_{th}$  for control and esca  
 905 symptomatic stems.

| Tyloses  | Esca                         | $k_s$<br>[kg s <sup>-1</sup> m <sup>-1</sup> Mpa <sup>-1</sup> ] | $k_{th}$<br>[kg s <sup>-1</sup> m <sup>-1</sup> Mpa <sup>-1</sup> ] | n<br>(stem - plant) | Regression                                                         |
|----------|------------------------------|------------------------------------------------------------------|---------------------------------------------------------------------|---------------------|--------------------------------------------------------------------|
|          | Control                      | 24.97 ± 1.72                                                     | 78.36 ± 4.51                                                        | 39 - 23             | $k_s = 0.3 \times k_{th} + 1.6$<br>R <sup>2</sup> =0.61 P<0.0001   |
| Absence  | Asymptomatic before symptoms | 26.04 ± 4.71                                                     | 74.75 ± 11.80                                                       | 6 - 6               | $k_s = 0.36 \times k_{th} - 0.94$<br>R <sup>2</sup> =0.82 P=0.013  |
|          | Pre-symptomatic              | 30.32 ± 4.26                                                     | 87.88 ± 8.54                                                        | 11 - 7              | $k_s = 0.37 \times k_{th} - 1.9$<br>R <sup>2</sup> =0.54 P=0.010   |
|          | Asymptomatic after symptoms  | 19.80 ± 5.18                                                     | 72.58 ± 12.64                                                       | 5 - 2               | $k_s = 0.33 \times k_{th} - 4$<br>R <sup>2</sup> =0.64 P=0.104     |
|          | Esca (tiger-stripe)          | 21.29 ± 5.40                                                     | 72.85 ± 10.41                                                       | 9 - 5               | $k_s = 0.45 \times k_{th} - 11.26$<br>R <sup>2</sup> =0.74 P=0.003 |
|          | Esca (tiger-stripe)          | 11.27 ± 2.86                                                     | 70.44 ± 7.81                                                        | 15 - 5              | $k_s = 0.17 \times k_{th} - 0.84$<br>R <sup>2</sup> =0.22 P=0.077  |
| Presence | Esca (apoplectic)            | 2.47 ± 1.45                                                      | 74.80 ± 33.48                                                       | 3 - 2               | $k_s = 0.04 \times k_{th} - 0.2$<br>R <sup>2</sup> =0.68 P=0.385   |
| Absence  | All                          | 25.06 ± 1.46                                                     | 78.42 ± 3.37                                                        | 70 - 37             | $k_s = 0.34 \times k_{th} - 1.90$<br>R <sup>2</sup> =0.63 P<0.0001 |
| Presence | All                          | 9.81 ± 2.51                                                      | 71.16 ± 8.00                                                        | 18 - 7              | $k_s = 0.12 \times k_{th} - 1.28$<br>R <sup>2</sup> =0.15 P=0.117  |

906 Values represent mean ± SE. n = sample size, (including the number of analyzed stems and-  
 907 number of analyzed plants, respectively). See text and Fig. 4 for statistical analysis. A detailed  
 908 esca symptom notation is provided in Fig. 1a. Bivariate plots of each regression are presented  
 909 in Fig. S4.

910 **Table 3.** Long-term impact of symptom presence (i.e. comparing plants with different disease  
 911 history record) in control plants on specific stem hydraulic conductivity ( $k_s$ ), theoretical stem  
 912 hydraulic conductivity ( $k_{th}$ ), stem total vessel density, and amount of *Phaeomonniella*  
 913 *chlamydospora* and *Phaeoacremonium minimum* DNA in trunks.  
 914

|                                                                  | Previously asymptomatic (pA) | Previously asymptomatic (pS) | Type III Tests of Fixed Effects (pA vs pS)         |
|------------------------------------------------------------------|------------------------------|------------------------------|----------------------------------------------------|
| $k_s$ [kg s <sup>-1</sup> m <sup>-1</sup> Mpa <sup>-1</sup> ]    | 23.76 ± 2.30                 | 26.54 ± 2.61                 | n=39, F <sub>1,16</sub> =1.19, P=0.29              |
| $k_{th}$ [kg s <sup>-1</sup> m <sup>-1</sup> Mpa <sup>-1</sup> ] | 72.22 ± 4.85                 | 86.30 ± 7.98                 | n=39, F <sub>1,16</sub> =3.01, P=0.10              |
| total vessel density [count mm <sup>-2</sup> ]                   | 57.28 ± 4.03                 | 52.61 ± 3.25                 | n=39, F <sub>1,16</sub> =0.72, P=0.41              |
| <i>P. chlamydospora</i> [pg ng <sup>-1</sup> ]                   | 6.14 ± 1.90                  | 10.15 ± 3.41                 | <b>n=13, F<sub>1,11</sub>=5900.06, P&lt;0.0001</b> |
| <i>P. minimum</i> [pg ng <sup>-1</sup> ]                         | 9.27 ± 6.97                  | 26.40 ± 13.83                | <b>n=13, F<sub>1,11</sub>=51014, P&lt;0.0001</b>   |

915 Values represent means ± SE. Pathogen quantification was estimated as: pg fungal DNA ng<sup>-1</sup>  
 916 total DNA. Statistical tests used are individual generalized linear mixed models to compare pA  
 917 vs pS plants (fixed effect) with the individual plants entered as a random effect in the models  
 918 and the year of uprooting as a co-variable (fixed effect). Statistically significant results  
 919 (P<0.05) are shown in bold.

920 **Table 4.** Quantification by qPCR of *Phaeoconiella chlamydospora* and *Phaeoacremonium*  
 921 *minimum* DNA in stems and trunks of different esca symptomatology.

| Organ | Esca                              | n  | <i>P. chlamydospora</i> [pg ng <sup>-1</sup> ] | <i>P. minimum</i> [pg ng <sup>-1</sup> ] |
|-------|-----------------------------------|----|------------------------------------------------|------------------------------------------|
| Stem  | Control                           | 8  | 0                                              | 0                                        |
|       | Pre-symptomatic                   | 3  | 0                                              | 0                                        |
|       | Asymptomatic<br>(after symptoms)  | 3  | 0                                              | 0                                        |
|       | Tiger-stripe<br>(without tyloses) | 4  | 0                                              | 0                                        |
|       | Tiger-stripe<br>(with tyloses)    | 8  | 0                                              | 0                                        |
|       | Apoplectic                        | 2  | 0                                              | 0                                        |
| Trunk | Control                           | 13 | 7.37 ± 1.67 (12/13)*                           | 14.54 ± 6.51 (12/13)*                    |
|       | Symptomatic                       | 7  | 15.80 ± 3.12 (7/7)*                            | 23.90 ± 8.82 (7/7)*                      |

\*Number of samples positive for the pathogen over the total number of analyzed samples.

922 Pathogen quantification was estimated as: pg fungal DNA per ng total DNA. Values represent  
 923 means ± SE, n = sample size. Trunks of symptomatic plants presented higher amount of both  
 924 *P. chlamydospora* and *P. minimum*, compared to control (n=20, F<sub>1,18</sub>=29806.11.25, P<0.0001  
 925 and n=20, F<sub>1,18</sub>=21925.4, P<0.0001, respectively). See text for statistical methods.
